# Supplementary material
Source: PubMed Central journal article supplement (PMC8206166)
Supplement: mmc3.pdf [file mmc3.pdf]

# Haploinsufficiency of the Sin3/HDAC corepressor complex member *SIN3B* causes a syndromic intellectual disability/autism spectrum disorder

Xenia Latypova,<sup>1,2,3,27</sup> Marie Vincent,<sup>1,3,27</sup> Alice Mollé,<sup>4,27</sup> Oluwadamilare A. Adebambo,<sup>2,27</sup> Cynthia Fourgeux,<sup>4</sup> Tahir N. Khan,<sup>2,5</sup> Alfonso Caro,<sup>6</sup> Monica Rosello,<sup>6</sup> Carmen Orellana,<sup>6</sup> Dmitriy Niyazov,<sup>7</sup> Damien Lederer,<sup>8</sup> Marie Deprez,<sup>9</sup> Yline Capri,<sup>10</sup> Peter Kannu,<sup>11</sup> Anne Claude Tabet,<sup>12</sup> Jonathan Levy,<sup>12</sup> Emmelien Aten,<sup>13</sup> Nicolette den Hollander,<sup>13</sup> Miranda Splitt,<sup>14</sup> Jagdeep Walia,<sup>15</sup> Ladonna L. Immken,<sup>16</sup> Pawel Stankiewicz,<sup>17</sup> Kirsty McWalter,<sup>18</sup> Sharon Suchy,<sup>18</sup> Raymond J. Louie,<sup>19</sup> Shannon Bell,<sup>19</sup> Roger E. Stevenson,<sup>19</sup> Justine Rousseau,<sup>20</sup> Catherine Willem,<sup>21</sup> Christelle Retiere,<sup>21,22,23</sup> Xiang-Jiao Yang,<sup>24</sup> Philippe M. Campeau,<sup>20</sup> Francisco Martinez,<sup>6</sup> Jill A. Rosenfeld,<sup>17</sup> Cédric Le Caignec,<sup>1,3</sup> Sébastien Küry,<sup>1,3</sup> Sandra Mercier,<sup>1,3</sup> Kamran Moradkhani,<sup>1</sup> Solène Conrad,<sup>1</sup> Thomas Besnard,<sup>1,3</sup> Benjamin Cogné,<sup>1,3</sup> Nicholas Katsanis,<sup>2,25,26</sup> Stéphane Bézieau,<sup>1,3</sup> Jeremie Poschmann,<sup>4,28,\*</sup> Erica E. Davis,<sup>25,26,28,\*</sup> and Bertrand Isidor<sup>1,3,28,\*</sup>

## Summary

Proteins involved in transcriptional regulation harbor a demonstrated enrichment of mutations in neurodevelopmental disorders. The Sin3 (Swi-independent 3)/histone deacetylase (HDAC) complex plays a central role in histone deacetylation and transcriptional repression. Among the two vertebrate paralogs encoding the Sin3 complex, *SIN3A* variants cause syndromic intellectual disability, but the clinical consequences of *SIN3B* haploinsufficiency in humans are uncharacterized. Here, we describe a syndrome hallmarked by intellectual disability, developmental delay, and dysmorphic facial features with variably penetrant autism spectrum disorder, congenital malformations, corpus callosum defects, and impaired growth caused by disruptive *SIN3B* variants. Using chromosomal microarray or exome sequencing, and through international data sharing efforts, we identified nine individuals with heterozygous *SIN3B* deletion or single-nucleotide variants. Five individuals harbor heterozygous deletions encompassing *SIN3B* that reside within a ~230 kb minimal region of overlap on 19p13.11, two individuals have a rare nonsynonymous substitution, and two individuals have a single-nucleotide deletion that results in a frameshift and predicted premature termination codon. To test the relevance of *SIN3B* impairment to measurable aspects of the human phenotype, we disrupted the orthologous zebrafish locus by genome editing and transient suppression. The mutant and morphant larvae display altered craniofacial patterning, commissural axon defects, and reduced body length supportive of an essential role for Sin3 function in growth and patterning of anterior structures. To investigate further the molecular consequences of *SIN3B* variants, we quantified genome-wide enhancer and promoter activity states by using H3K27ac ChIP-seq. We show that, similar to *SIN3A* mutations, *SIN3B* disruption causes hyperacetylation of a subset of enhancers and promoters in peripheral blood mononuclear cells. Together, these data demonstrate that *SIN3B* haploinsufficiency leads to a hitherto unknown intellectual disability/autism syndrome, uncover a crucial role of *SIN3B* in the central nervous system, and define the epigenetic landscape associated with Sin3 complex impairment.

Impairment of transcriptional regulation has been linked closely to the molecular etiology of intellectual disability (ID) and autism spectrum disorders (ASDs).<sup>1–3</sup> Specifically, multiple genes mutated in Mendelian disorders with a neurodevelopmental or neuroanatomical aspect, and notably ID/ASD genes, have been found to encode

<sup>1</sup>Service de Génétique Médicale, CHU Nantes, 9 quai Moncousu, 44093 Nantes Cedex 1, France; <sup>2</sup>Center for Human Disease Modeling, Duke University Medical Center, Durham, NC 27701, USA; <sup>3</sup>L'Institut du Thorax, INSERM, CNRS, Université de Nantes, 44007 Nantes, France; <sup>4</sup>Université de Nantes, CHU Nantes, Inserm, Centre de Recherche en Transplantation et Immunologie, UMR 1064, ITUN, 44000 Nantes, France; <sup>5</sup>Department of Biological Sciences, National University of Medical Sciences, 46000 Rawalpindi, Pakistan; <sup>6</sup>Unidad de Genética, Grupo de Investigación Traslacional en Genética, Hospital Universitario y Politécnico La Fe, 46026 Valencia, Spain; <sup>7</sup>Department of Pediatrics, Ochsner Clinic, New Orleans, LA 70128, USA; <sup>8</sup>Centre de Génétique Humaine, IPG, 6041 Gosselies, Belgium; <sup>9</sup>Service de Neuropédiatrie, Clinique Saint Elizabeth, 5000 Namur, Belgium; <sup>10</sup>Service de Génétique Médicale, Hôpital Robert Debré, 75019 Paris, France; <sup>11</sup>Division of Clinical and Metabolic Genetics, The Hospital for Sick Children, Toronto, ON M5G 1X8, Canada; <sup>12</sup>Service de Cytogénétique, Hôpital Robert Debré, 75019 Paris, France; <sup>13</sup>Department of Clinical Genetics, Leiden University Medical Center, 2333 Leiden, the Netherlands; <sup>14</sup>Northern Genetics Service, Institute of Genetic Medicine, Newcastle Upon Tyne NE1 3BZ, UK; <sup>15</sup>Kingston General Hospital Research Institute, 76 Stuart Street, Kingston, ON K7L 2V7, Canada; <sup>16</sup>Clinical Genetics, Dell Children's Medical Group, Austin, TX 78731, USA; <sup>17</sup>Department of Molecular and Human Genetics, Baylor College of Medicine, Houston, TX 77030, USA; <sup>18</sup>GeneDx, 207 Perry Parkway, Gaithersburg, MD 20877, USA; <sup>19</sup>Greenwood Genetic Center, 106 Gregor Mendel Cir, Greenwood, SC 29646, USA; <sup>20</sup>Sainte-Justine Hospital, 3175, Cote-Sainte-Catherine, Montreal, QC, Canada; <sup>21</sup>Etablissement Français du Sang, 44000 Nantes, France; <sup>22</sup>CRCINA, INSERM, CNRS, Université d'Angers, Université de Nantes, 44000 Nantes, France; <sup>23</sup>LabEx IGO, Nantes 44000, France; <sup>24</sup>Rosalind & Morris Goodman Cancer Research Center and Department of Medicine, McGill University, Montreal, QC H3A 1A3, Canada; <sup>25</sup>Advanced Center for Translational and Genetic Medicine, Stanley Manne Children's Research Institute, Ann & Robert H. Lurie Children's Hospital of Chicago, Chicago, IL 60611, USA; <sup>26</sup>Department of Pediatrics, Feinberg School of Medicine, Northwestern University, Chicago, IL 60611, USA

<sup>27</sup>These authors contributed equally

<sup>28</sup>These authors contributed equally

\*Correspondence: [bertrand.isidor@chu-nantes.fr](mailto:bertrand.isidor@chu-nantes.fr) (B.I.), [eridavis@luriechildrens.org](mailto:eridavis@luriechildrens.org) (E.E.D.), [jeremie.poschmann@univ-nantes.fr](mailto:jeremie.poschmann@univ-nantes.fr) (J.P.)

<https://doi.org/10.1016/j.ajhg.2021.03.017>

© 2021 American Society of Human Genetics.

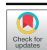

chromatin regulators.<sup>4–6</sup> Eukaryotic chromatin structure is organized in histone octamers of the four core histones, H2A, H2B, H3, and H4, forming nucleosomes to ensure DNA compaction. Post-translational modifications of histone N termini, particularly acetylation, play decisive roles in the dynamic regulation of gene transcription. Histone deacetylation is executed by the histone deacetylase (HDAC) enzymes HDAC1 and HDAC2 and is dependent upon complexes containing Sin3, MecP2,<sup>7</sup> NuRD, and CoREST.<sup>8–10</sup> Recruitment of the Sin3 corepressor module leads to deacetylation of histones H3 and H4.<sup>11</sup> The core SIN3-HDAC complex acts as a scaffold for the assembly of multiple cofactors.<sup>12–14</sup> In mammals, two genes encode master factors of the Sin3 complex, *SIN3A* (MIM: 607776) and *SIN3B* (MIM: 607777). *SIN3A* disruption in humans causes syndromic ID with craniofacial defects (Witteveen-Kolk syndrome [MIM: 613406]).<sup>15</sup> Consequences of *SIN3B* disruption in humans are hitherto poorly understood.

In this study, we report the phenotypic features associated with haploinsufficiency at the *SIN3B* locus through combined analysis of clinical and cerebral MRI data collected for nine individuals harboring rare *SIN3B* variants (seven *de novo* and two of undetermined origin due to an inaccessible parental sample). We identified five copy number variant (CNV) deletions at 19q13.11, which encompass *SIN3B* (0.427 to 1.5 Mb; smallest region of overlap, SRO, ~230 kb, hg19), and four single nucleotide variants (SNV) in the coding regions of *SIN3B* (Table 1). To investigate the consequences of *SIN3B* loss *in vivo*, we ablated *sin3b* in zebrafish (*Danio rerio*) larvae with a transgenic reporter of cartilage formation in the pharyngeal skeleton by CRISPR/Cas9 genome editing and transient morpholino (MO)-based suppression. We recapitulate multiple aspects of the human phenotype in zebrafish and demonstrate pathogenicity for the two missense variants. Furthermore, we investigated the epigenetic consequences of *SIN3B* variation by epigenomic profiling the peripheral blood mononuclear cells (PBMCs) from an affected CNV deletion-bearing individual compared with his family members and compared with data generated from PBMCs from a *SIN3A* CNV deletion pedigree. The results suggest that *SIN3B* disruption leads to increased histone acetylation in this individual, which is consistent with *SIN3A* ablation and the repressor function of the Sin3 complex.

Nine affected individuals were referred independently for genetic counseling and clinical genetic testing because of unexplained ID or ASD (Table 1). We obtained written informed consent from each affected individual and available family members prior to inclusion in genetics research in accordance with each respective institution's human subjects ethics committee. All participants were assessed by at least one expert clinical geneticist from each respective participating center (Table 1; supplemental notes).

To investigate the possibility that CNVs could contribute to the ID/ASD features, we performed chromosomal micro-

array studies (Table S1). Individuals 1, 2, 3, 4, and 5 carry microdeletions of 1.02, 1.5, 0.87, 0.88, and 0.43 Mb, respectively, at the 19p13.11 locus, all of which encompass *SIN3B* (Figure 1A; Table S2). Notably, *de novo* deletions of this chromosomal region have been implicated previously in multi-system pathologies in humans, including neurodevelopmental disorders. Aten and colleagues reported an affected male who harbored a 0.99 Mb *de novo* deletion that contains 28 genes (Table 1; Table S2),<sup>16</sup> and Bens et al. described a female pediatric affected individual with an overlapping 1.12 Mb microdeletion at 19p13.11 (Table 1; Table S2).<sup>17</sup> Comparison of the microdeletions reported in these two affected individuals with the five individuals in our study yielded a smallest region of overlap (SRO) of ~230 kb, which contains four genes (*NWD1* [MIM: 616250], *SIN3B*, *F2RL3* [MIM: 602779], and *CPAMD8* [MIM: 608841]; Figure 1A; Table S2). *In silico* predictions suggested *SIN3B* to be the most likely candidate disease driver gene because of its high probability of loss of function (LoF) intolerance (pLI) score<sup>18</sup> (*SIN3B* pLI > 0.9; *NWD1*, *F2RL3*, *CPAMD8* pLI = 0; Table S2). Individual 3 carried an additional *de novo* deletion of 1.6 Mb at 18p11.31 (chr18: 3,192,682–4,854,252, GRCh37/hg19), encompassing four genes (*MYOM1* [MIM: 603508], *MYL12B* [MIM: 609211], *TGIF1* [MIM: 602630], and *DLGAP1* [MIM: 605445]). *TGIF1* loss-of-function variants have been described in holoprosencephaly type 4 (MIM: 142946).<sup>19</sup> *MYOM1*, *MYL12B*, and *DLGAP1* have not been linked to a human disorder. However, this second mutational event most likely plays a role in the phenotype of individual 3. Additionally, the individual described by Aten et al. presents with split hand and foot malformation (SHFM) (Table 1).<sup>16</sup> *EPS15L1* (MIM: 616826) was considered to be responsible for the limb phenotype and is not included in the SRO reported in our study (Figure 1; Table S2).

Next, we asked whether pathogenic variants in any of these genes in the SRO had been implicated in phenotypes overlapping with 19p13.11 deletion carriers. *NWD1* and *F2RL3* have not been implicated previously in human genetic disorders. Bi-allelic mutations in *CPAMD8* cause anterior segment dysgenesis<sup>20</sup> (MIM: 617319), but carriers of heterozygous loss-of-function variants are not known to have neurodevelopmental symptoms. Individual 3 presents with ocular anterior segment dysgenesis (Table 1), and we cannot exclude the possibility of a variant in *CPAMD8* on the non-deleted allele that could explain a part of this individual's ocular phenotype. However, a likely disruptive variant was identified in *SIN3B* in a previous study within a large syndromic ID cohort<sup>21</sup> but was only reported as a candidate because of a lack of genetic evidence in support of causality. Here, we report the same individual with the frameshift *de novo* variant located in exon 1 of *SIN3B* (c.31delA [p.Ser11Alafs\*11] [GenBank: NM\_015260.4]) as individual 6 (Figure 1B; Table 1). This SNV is absent from >240,000 alleles in the Genome Aggregation Database (gnomAD; accessed September 22, 2019),

**Table 1. Clinical features of five individuals with *de novo* 19p13.11 microdeletions encompassing *SIN3B* and four individuals with point mutations in *SIN3B***

| Individual identifier                   | 1                             | 2                                  | 3                            | 4                                                              | 5                                       | 6                                  | 7                               | 8                                    | 9                              | Total                      | Aten et al., 2009 <sup>16</sup> | Bens et al., 2011 <sup>17</sup>      |
|-----------------------------------------|-------------------------------|------------------------------------|------------------------------|----------------------------------------------------------------|-----------------------------------------|------------------------------------|---------------------------------|--------------------------------------|--------------------------------|----------------------------|---------------------------------|--------------------------------------|
| <b>DECIPHER identifier (v.9.21)</b>     | 332280                        | 262142                             | NA                           | NA                                                             | 308455                                  | 325602                             | NA                              | NA                                   | NA                             | NA                         | 4101                            | NA                                   |
| <b>Genotype<sup>a,b</sup></b>           |                               |                                    |                              |                                                                |                                         |                                    |                                 |                                      |                                |                            |                                 |                                      |
| <b>Variant type</b>                     | CNV, deletion                 | CNV, deletion                      | CNV, deletion                | CNV, deletion                                                  | CNV, deletion                           | SNV, frameshift                    | SNV, frameshift                 | SNV, nonsynonymous                   | SNV, nonsynonymous             | 5 CNV del, 4 SNV           | CNV, deletion                   | CNV, deletion                        |
| <b>Inheritance</b>                      | <i>de novo</i>                | <i>de novo</i>                     | <i>de novo</i>               | <i>de novo</i>                                                 | <i>de novo</i>                          | <i>de novo</i>                     | parents unavailable for testing | <i>de novo</i>                       | father unavailable for testing | 7 confirmed <i>de novo</i> | <i>de novo</i>                  | <i>de novo</i>                       |
| <b>Variant details</b>                  | 19: 16848440–17871985         | 19: 15978604–17500427              | 19: 16599950–17469382        | 19: 16456955–17333482                                          | 19: 16652215–17079033                   | c.31delA (p.Ser11Alafs*11)         | c.1579delC (p.Arg527Glyfs*12)   | c.249C>G (p.Ile83Met)                | c.58G>A (p.Gly20Arg)           | NA                         | 19: 16548375–17547292           | 19: 16611808–17733344                |
| <b>Size</b>                             | 1.02 Mb                       | 1.52 Mb                            | 869 kb                       | 877 kb                                                         | 427 kb                                  | NA                                 | NA                              | NA                                   | NA                             | NA                         | 0.99 Mb                         | 1.12 Mb                              |
| <b>Clinical phenotypes</b>              |                               |                                    |                              |                                                                |                                         |                                    |                                 |                                      |                                |                            |                                 |                                      |
| <b>Sex</b>                              | M                             | F                                  | M                            | F                                                              | M                                       | M                                  | M                               | M                                    | M                              | NA                         | M                               | F                                    |
| <b>Age at last clinical examination</b> | 20 years                      | 11 years                           | 2 years 6 months             | 8 years 10 months                                              | 3 years 10 months                       | 15 years                           | 50 years 4 months               | 3 years                              | 5 years                        | NA                         | 6 years                         | 4 years                              |
| <b>Growth parameters</b>                | W: –4 SD, H: –2 SD, OFC: 0 SD | W: +1 SD, H: –0.5 SD, OFC: –0.5 SD | W: –0.5 SD, H: N, OFC: –3 SD | W: –1 SD, H: +0.5 SD, OFC: –1.5 SD                             | W: –0.75 SD, H: –1.04 SD, OFC: –0.97 SD | W: +3 SD, H: +2.5 SD, OFC: +2.5 SD | W: –1 SD, H: –2 SD, OFC: N      | W: +1.2 SD, H: –0.5 SD, OFC: –0.5 SD | W: +2 SD, H: +2 SD, OFC: +2 SD | NA                         | W: ND, H: –0.3 SD, OFC: –1 SD   | W: –1.4 SD, H: –1.9 SD, OFC: –3.5 SD |
| <b>DD/ID</b>                            | – (IQ 96)                     | + (IQ 41)                          | + (IQ ND)                    | + (WISC-IV)                                                    | + (IQ ND)                               | + (IQ ND)                          | + (IQ 56)                       | + (IQ ND)                            | + (IQ ND)                      | 8/9                        | + (IQ ND)                       | + (IQ ND)                            |
| <b>DD/ID severity</b>                   | NA                            | moderate                           | moderate                     | mild                                                           | mild                                    | mild                               | mild                            | moderate                             | mild                           | 5 mild, 3 moderate         | severe                          | severe                               |
| <b>Age at independent walking</b>       | 18 months                     | 2 years 8 months                   | 2 years 4 months             | 13 months                                                      | 24 months                               | 24 months                          | ND                              | 22 months                            | 18 months                      | NA                         | ND                              | ND                                   |
| <b>Speech delay</b>                     | –                             | +                                  | +                            | – (articulation problems)                                      | –                                       | +                                  | +                               | +                                    | +                              | 6/9                        | +                               | +                                    |
| <b>ASD</b>                              | +                             | –                                  | –                            | –                                                              | –                                       | +                                  | –                               | –                                    | +                              | 3/9                        | –                               | –                                    |
| <b>Other behavioral disorders</b>       | ADHD                          | ADHD                               | –                            | hyperactivity, impulsivity, low frustration tolerance, anxiety | –                                       | aggressive behavior                | echolalia                       | –                                    | ADHD                           | 6/9                        | –                               | –                                    |

(Continued on next page)

**Table 1. Continued**

| <b>Individual identifier</b>           | <b>1</b>                                                           | <b>2</b>                                              | <b>3</b>                                                                                           | <b>4</b>                                                                                 | <b>5</b>                              | <b>6</b>                                           | <b>7</b>    | <b>8</b>               | <b>9</b>                                                    | <b>Total</b> | <b>Aten et al., 2009<sup>16</sup></b> | <b>Bens et al., 2011<sup>17</sup></b>                        |
|----------------------------------------|--------------------------------------------------------------------|-------------------------------------------------------|----------------------------------------------------------------------------------------------------|------------------------------------------------------------------------------------------|---------------------------------------|----------------------------------------------------|-------------|------------------------|-------------------------------------------------------------|--------------|---------------------------------------|--------------------------------------------------------------|
| <b>Epilepsy</b>                        | –                                                                  | –                                                     | –                                                                                                  | –                                                                                        | –                                     | –                                                  | +           | –                      | –                                                           | 1/9          | –                                     | –                                                            |
| <b>Brain MRI</b>                       | N                                                                  | N                                                     | short CC, olfactory bulb agenesis                                                                  | mild tonsillar ectopia                                                                   | ND                                    | defects in CC and subependymal nodular heterotopia | N           | ND                     | ND                                                          | 3/6          | ND                                    | ND                                                           |
| <b>Dysmorphic features<sup>c</sup></b> | +                                                                  | +                                                     | +                                                                                                  | +                                                                                        | +                                     | +                                                  | +           | +                      | +                                                           | 9/9          | +                                     | +                                                            |
| <b>Limb abnormalities</b>              | short hands                                                        | bilateral fifth fingers clinodactyly, genu recurvatum | –                                                                                                  | clinodactyly of the 2 <sup>nd</sup> and 5 <sup>th</sup> digits, tapered distal phalanges | –                                     | –                                                  | –           | –                      | bilateral radio-ulnar synostosis                            | 4/9          | SHFM                                  | –                                                            |
| <b>MCA</b>                             | –                                                                  | VSD, bifid uvula, strabismus                          | VSD, left iris coloboma, ocular anterior segment dysgenesis, left cleft lip and palate, micropenis | bifid uvula, strabismus                                                                  | tetralogy of Fallot, preauricular pit | –                                                  | –           | intestinal malrotation | ND                                                          | 5/8          | tetralogy of Fallot                   | –                                                            |
| <b>Additional phenotypic features</b>  | myopia, daytime hypersomnia, decreased melatonin urinary excretion | ataxia                                                | –                                                                                                  | umbilical hernia, clumsiness, myopia, hypotonia                                          | pectus carinatum                      | conductive hearing loss                            | hand tremor | –                      | ND                                                          | NA           | strabismus                            | initial poor feeding, premature pubarche, strabismus, ataxia |
| <b>Additional genetic findings</b>     | –                                                                  | –                                                     | CNV deletion (1.6 Mb) <i>de novo</i> , 18:3192682–4854252                                          | –                                                                                        | –                                     | –                                                  | –           | –                      | <i>CNOT1</i> c.4861A>G (p.Ile1621Val) (unknown inheritance) | NA           | ND                                    | ND                                                           |

Abbreviations are as follows: NA, not applicable; M, male; F, female; W, weight; H, height; OFC, occipitofrontal head circumference; SD, standard deviation; ND, no data; N, normal; DD, developmental delay; ID, intellectual disability; WISC-IV, Wechsler Intelligence Scale for Children; ASD, autism spectrum disorder; MRI, magnetic resonance imaging; MCA, multiple congenital anomalies; ADHD, attention deficit hyperactivity disorder; CC, corpus callosum; VSD, ventricular septal defect; SHFM, split hand and foot malformation; p, percentile; +, affected; –, not affected; CNV, copy number variant; del, deletion; SNV, single-nucleotide variant.

<sup>a</sup>The reference genome used for annotations is GRCh37/hg19.

<sup>b</sup>Coding DNA/protein variant described according to the nomenclature HGVS v.2.0 established by the Human Genome Variation Society; GenBank: NM\_015260.4 and NP\_056075.1.

<sup>c</sup>For dysmorphic features, see [supplemental notes](#).

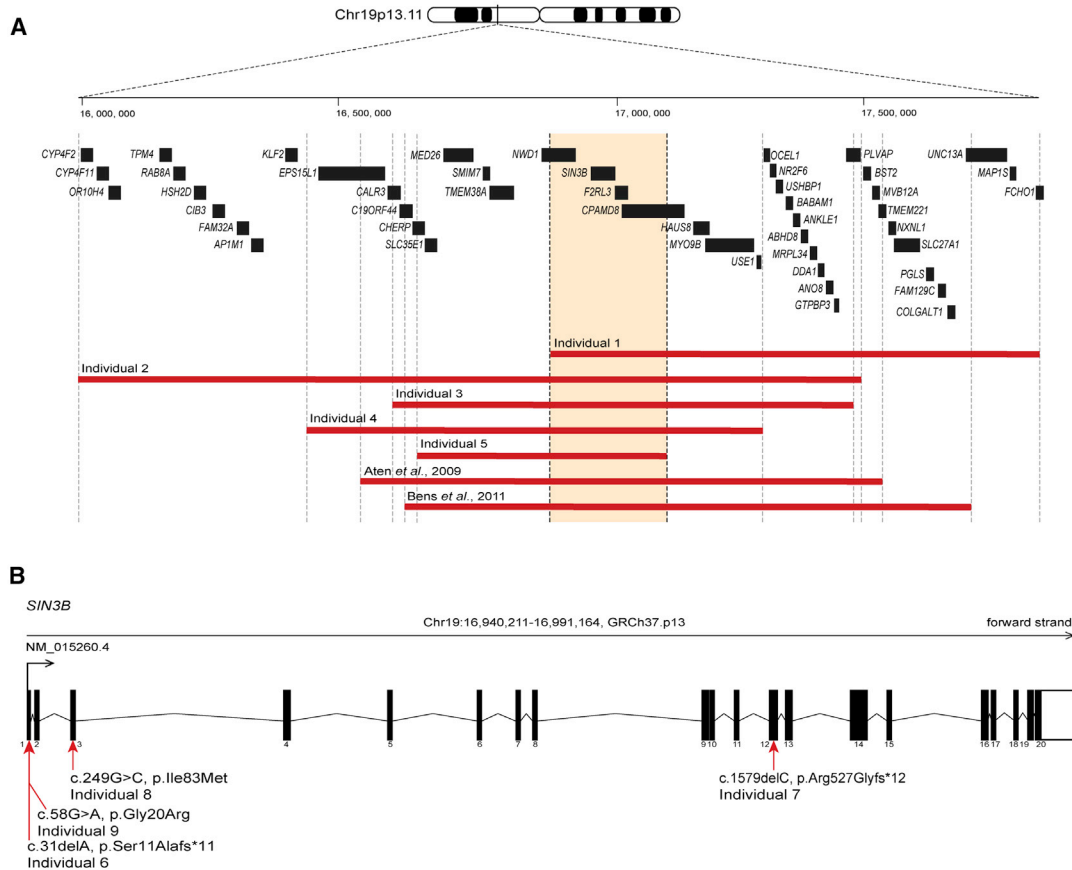

**Figure 1. Copy number variants and single nucleotide variants altering *SIN3B* cause intellectual disability with autistic features**  
 (A) Schematic depicting *SIN3B* (GRCh37.p13; chr19: 16,940,211–16,991,164) at the 19p13.11 locus. CNV deletions (red bars) encompassing *SIN3B* in individuals 1, 2, 3, 4, and 5, as well as two previously reported individuals,<sup>16,17</sup> are shown. Gene positions are indicated by black boxes, and genes located in smallest region of overlap are included in orange box between vertical dashed lines.  
 (B) Exon structure of longest *SIN3B* transcript, containing 20 exons (GenBank: NM\_015260.4). Variants c.31delA (p.Ser11Alafs\*11) (individual 6); c.1579delC (p.Arg527Glyfs\*12) (individual 7); c.249C>G (p.Ile83Met) (individual 8); and c.58G>A (p.Gly20Arg) (individual 9) are indicated with red arrows.

and the variant transcript is predicted to be degraded by nonsense-mediated decay, resulting in *SIN3B* haploinsufficiency. However, cell lines derived from the affected individual were not available to test this possibility experimentally.

We turned to community data-sharing platforms<sup>22</sup> to ask whether additional affected individuals might be present with deleterious mutations and overlapping clinical features at this locus. We identified individual 7, who carries a c.1579delC (p.Arg527Glyfs\*12) frameshift variant in exon 12 (Figure 1B; Table 1). Parental samples were not available for segregation analysis. Exome sequencing (ES) of individual 8 identified a *de novo* c.249C>G (p.Ile83Met) change that is predicted to be damaging by *in silico* classifiers and is absent from gnomAD (Figures 1B, 2, and S1; Tables 1, S1, and S3). This change affects a conserved residue within the first paired amphipathic helix (PAH) domain of *SIN3B*, which is responsible for interaction with members of Sin3/HDAC complex (Figures 2 and S1). Individual 9 harbors a heterozygous c.58G>A (p.Gly20Arg) variant (Figures 1B, 2, and S1; Tables 1 and S1). This variant is absent from gnomAD and is predicted to be deleterious *in silico* (Table

S3). This change was not detected in genomic DNA from individual 9's mother, but the paternal sample was not available to confirm the mode of inheritance. Individual 9 also harbors a variant of uncertain significance in *CNOT1* (MIM: 604917), a locus known to cause either dominant holoprosencephaly<sup>23,24</sup> (MIM: 618500) or Vissers-Bodmer syndrome<sup>25</sup> (MIM:619033; c.4861A>G [p.Ile1621Val] [GenBank: NM\_001265612.2]), for which contribution to the phenotype cannot be excluded (Table 1). Even so, we considered this *SIN3B* variant, in combination with individual 9's neurodevelopmental phenotypes, to be potentially relevant to our case series. Together, these two ultra-rare missense variants were supportive, but not conclusive, in implicating *SIN3B* involvement in the ID/developmental delay (DD) phenotypes observed in individuals 1–5, who harbor CNVs on 19p13.11, and in individuals 6 and 7, who harbor frameshift variants.

All nine individuals presented with a constellation of cognitive and neuroanatomical phenotypes. The most frequently reported features included ID and DD (in 8/9), classified as mild (individuals 4, 5, 6, 7, and 9) and moderate (individuals 2, 3, and 8; Table 1). In addition to ID/DD,

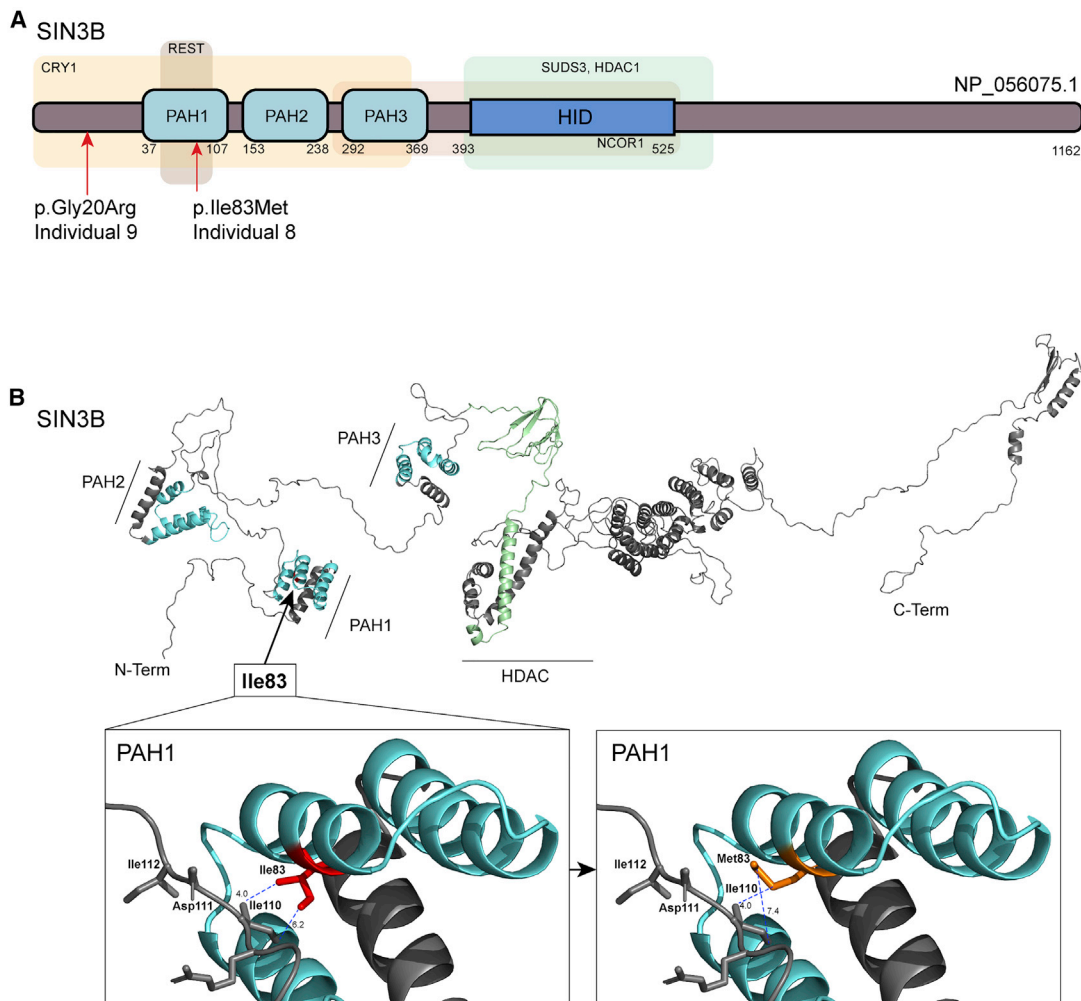

**Figure 2. *In silico* protein modeling of *SIN3B* nonsynonymous variants indicate likely disruption of protein function**

(A) *SIN3B* protein structure (GenBank: NP\_056075.1). Three paired amphipathic helix (PAH domains) predicted on the N-terminal region of *SIN3B* are indicated by light blue boxes. Regions that interact (predicted by similarity with murine *Sin3b*) with *CRY1* (cryptochrome circadian clock 1), *REST* (RE1-silencing transcription factor), *SUDS* (*Sin3* histone deacetylase corepressor complex component *SDS*), *HDAC1* (histone deacetylase 1), *NCOR1* (nuclear receptor corepressor 1), and *HID* (HDAC-interacting domain) are indicated by light-colored boxes.

(B) *In silico* three-dimensional view of *SIN3B*. Variant c.249C>G encodes p.Ile83Met, which affects a residue located in the PAH1 domain nearest to the N terminus, which is predicted to mediate protein-protein interaction with transcriptional corepressors *REST* and *CRY1*. Protein Data Bank (PDB) file was generated by RaptorX and analyzed in Pymol 2.0. PAH domains are colored in turquoise and *HID* is colored in light green. Distance (Å) between side chains of wild-type (Ile83; left box) and mutant (Met83; right box) *SIN3B* and the closest residue on the opposing side of the protein are measured as indicated (blue dashed lines).

three individuals fulfilled clinical diagnostic criteria for ASD (individuals 1, 6, and 9). Moreover, three individuals had attention deficit hyperactivity disorder (ADHD; individuals 1, 2, and 9). Cerebral MRI showed variable features; these included corpus callosum defects and subependymal nodular heterotopia (individual 6, Figure 3B), hypoplastic corpus callosum (individual 3, who also has a *TGIF1* deletion), and mild tonsillar ectopia (individual 4); the other half of the cohort presented no detectable MRI abnormalities at last assessment or did not have brain imaging (Table 1). Individual 7 had generalized tonic-clonic seizures starting at age 3. Some individuals presented with short stature for age (individuals 1 and 7). Additionally, cardiac defects were present in three individuals, specifically ventricular

septal defect (VSD; individuals 2 and 3) and tetralogy of Fallot (individual 5). Three individuals presented with labiopalatine cleft or bifid uvula (individuals 2, 3, and 4). Although several affected individuals displayed dysmorphic facial features, including broad nasal root, arched and full eyebrows, synophrys, or epicanthus, no unifying facial gestalt was evident across all affected individuals (Figure 3A).

Zebrafish mutants harboring truncating mutations in *sin3b* display locomotion defects, delayed ossification, and shortened body length.<sup>26</sup> With the exception of variable growth phenotypes in our cohort (Table 1), these aberrant zebrafish mutant phenotypes did not have discrete anatomical correlates with features of our human cohort.



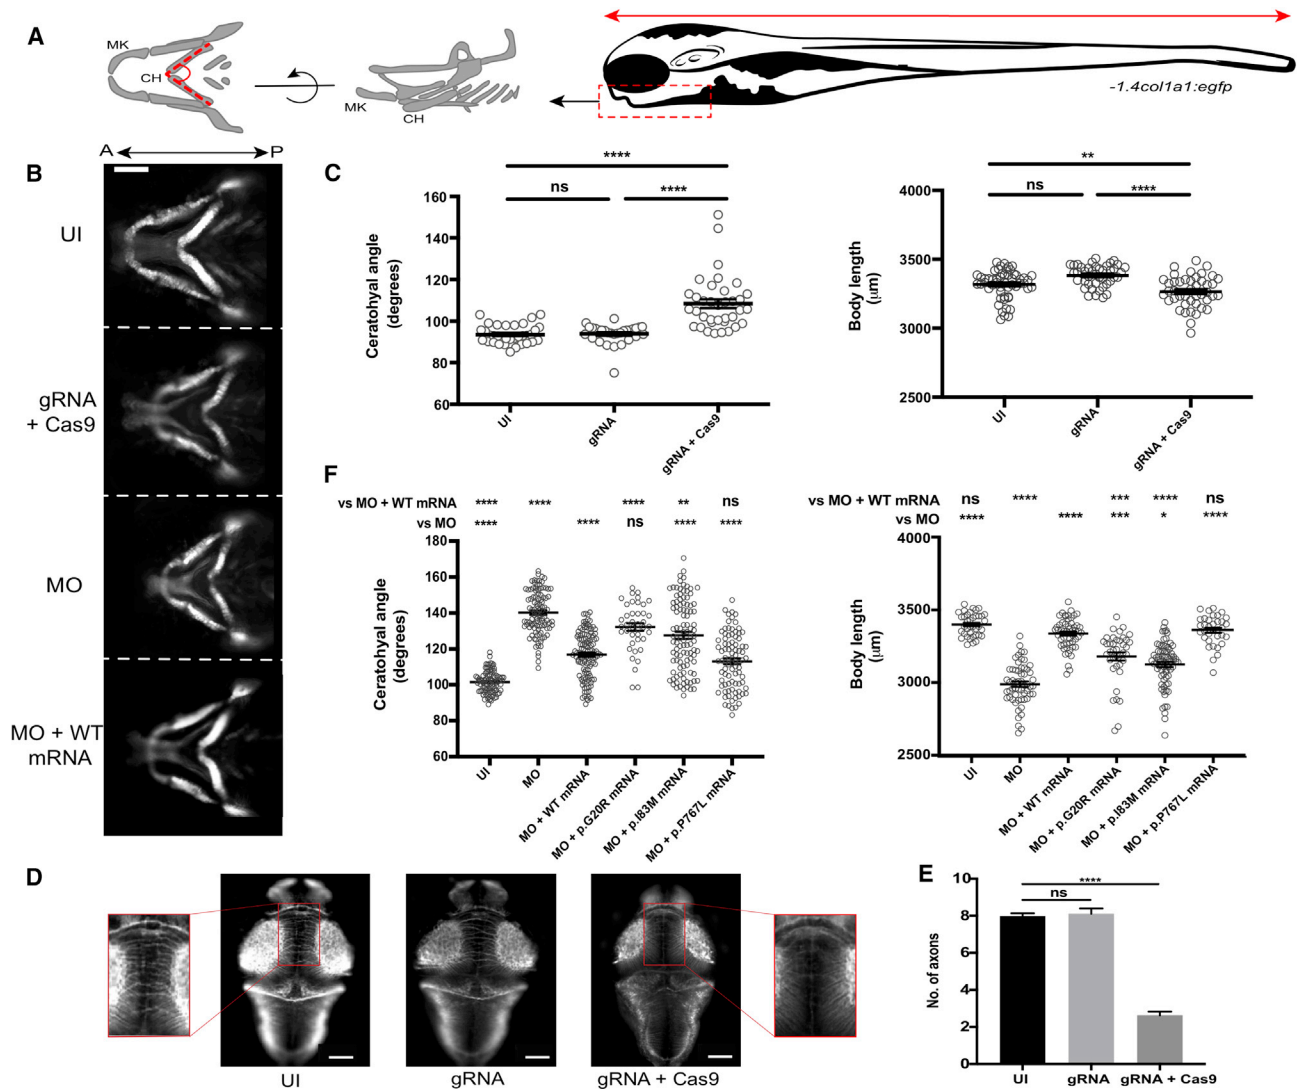

**Figure 4. Modeling of *sin3b* disruption in zebrafish shows abnormal craniofacial patterning, reduced body length, and pathogenicity of case-associated missense variants**

(A) Schematic of structures of interest used for *in vivo* measurements in developing zebrafish larvae at 3 days post fertilization (dpf); cartilaginous craniofacial structures (left, angle between dashed lines); body length (right, red horizontal arrow); CH, ceratohyal cartilage; MK, Meckel cartilage. *-1.4col1a1:egfp* transgenic zebrafish larvae were positioned with the Vertebrate Automated Screening Technology (VAST) BioImager and ventral fluorescent images were captured as indicated (right panel, red vertical arrow).

(B) Representative ventral images of *in vivo* models of *sin3b* disruption in zebrafish. CH angle was measured as indicated in (A). UI, uninjected; MO, morpholino; WT, human *SIN3B* mRNA. Scale bar, 100  $\mu$ m.

(C) Quantification of craniofacial defects and body length in CRISPR/Cas9 F0 mutants. Small insertions and deletions were introduced into *sin3b* exon 13 via a high-efficiency guide RNA (gRNA). Targeting with gRNA leads to an increase of CH angle (left) and decrease in body length (right), indicating a crucial role for the Sin3 complex in the patterning of anterior structures and growth ( $n = 21\text{--}34$  and  $21\text{--}27$  larvae/batch, repeated, for craniofacial and body length, respectively).

(D) Representative images showing fluorescent signal detected from the dorsal aspect of fixed and acetylated tubulin antibody-stained 3dpf larvae. Zoomed insets (left and right) show the region assessed for commissural neurons that cross the midline.

(E) Quantification of intertectal neurons in *sin3b* F0 mutants as a proxy for corpus callosum defects in *SIN3B* mutation-bearing humans.  $n = 49\text{--}50$  larvae/batch, repeated.

(F) Transient suppression models mimic *sin3b* CRISPR F0 mutants. *sin3b* morphants (injected with 9 ng of e2i2 splice-blocking [sb] MO) display a broadened CH angle (left) and shortened body length (right) compared with uninjected controls. Coinjection of *sin3b* e2i2 splice-blocking MO with 100 pg of *SIN3B* WT human mRNA rescues this phenotype significantly. Coinjection of MO with case-specific variant mRNA (encoding p.Gly20Arg and p.Ile83Met) resulted in significantly reduced ability to rescue CH and body length compared with *SIN3B* WT mRNA ( $n = 41\text{--}61$  larvae/batch, repeated). p.Pro767Leu is a negative control variant (rs117307745; six homozygotes in gnomAD). Statistical analyses were performed via a non-parametric Kruskal-Wallis test. \*\*\*\* $p < 0.0001$ ; \*\*\* $p < 0.001$ ; \*\* $p < 0.01$ ; \* $p < 0.05$ ; ns, not significant; error bars represent standard error of the mean.



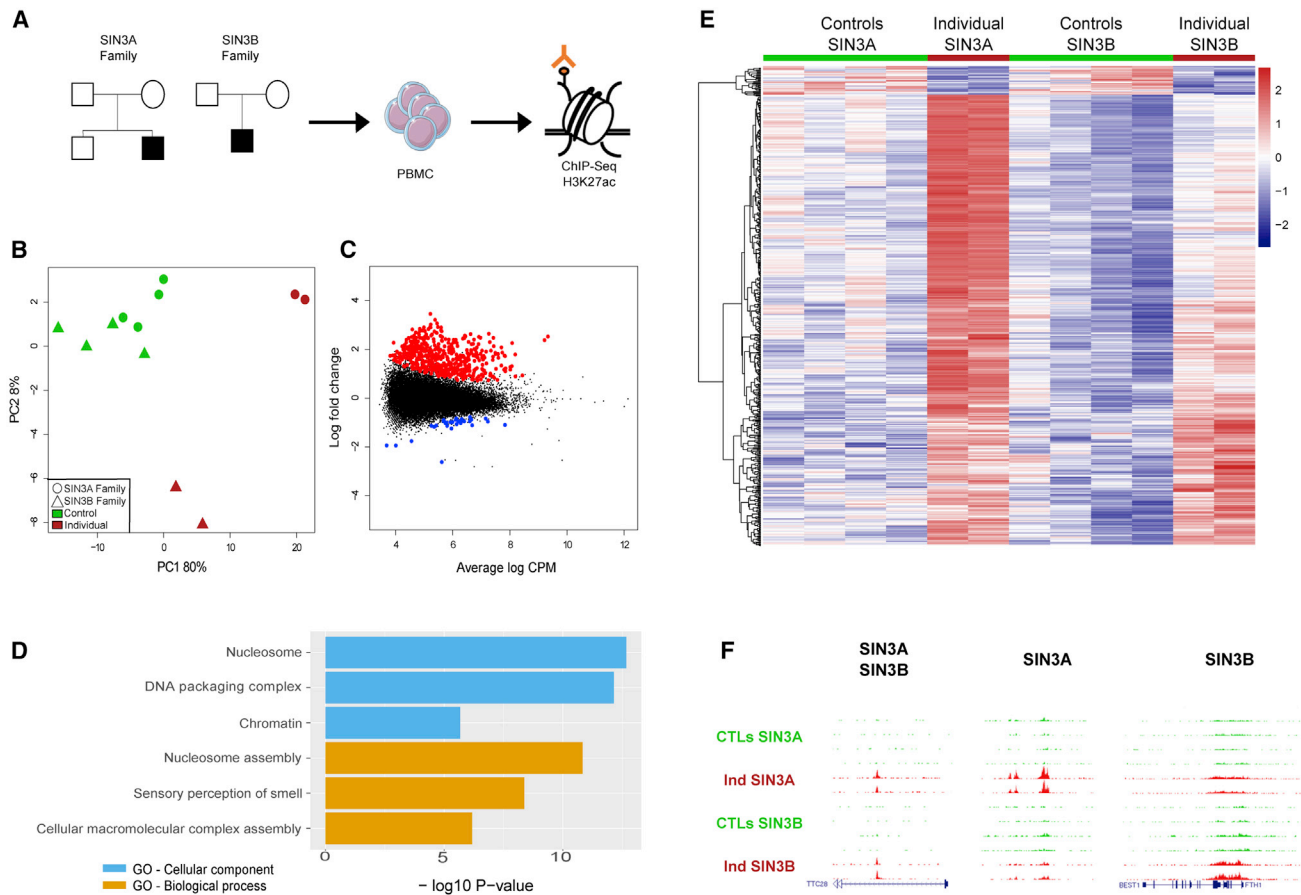

**Figure 5. Histone acetylation (H3K27ac) analysis in cells derived from affected individuals with *SIN3A* or *SIN3B* deletion CNVs compared with within-pedigree control individuals reveals hyperacetylation in affected individuals**

(A) Diagram showing the experimental approach of the ChIP-seq H3K27ac analysis performed on peripheral blood mononuclear cells (PBMCs) from affected individuals compared with their healthy family members. We characterized genome-wide histone acetylation changes in one individual with a *SIN3A* deletion (individual 4 in Witteveen et al.<sup>15</sup> with a ~350 kb microdeletion) and individual 1 from this study with a *SIN3B* deletion (see Figure 1).

(B) PCA (principal-component analysis) plot of peak heights from the 532 differentially acetylated peaks between all control individuals compared with affected individuals.

(C) MA (log ratio-mean average) plot showing hyperacetylated (red) and hypoacetylated (blue) peaks for both *SIN3A/B*-affected individuals versus all control individuals.

(D) Top three most significant functional groups corresponding to hyperacetylated peaks. GO, gene ontology.

(E) Heatmap of unsupervised clustering of differentially acetylated peaks; Z scores were calculated from normalized counts per million reads.

(F) Representative ChIP-seq genome browser tracks highlighting commonly hyperacetylated peaks in *SIN3A* and *SIN3B* deletion-bearing individuals (left) and exemplar hyperacetylated peaks distinct to either *SIN3A* (center)- or *SIN3B* (right)-affected individuals. CTL, control; Ind, affected individual.

pathogenicity of the p.Gly20Arg and p.Ile83Met variants, we compared the efficiency of variant *SIN3B* mRNA to rescue the morphant phenotype versus WT mRNA for both craniofacial patterning and body length. We used a common variant from gnomAD, p.Pro767Leu, as a negative control (dbSNP: rs117307745, six homozygotes in 282,500 individuals). In replicate experiments, the case-associated SNVs scored as hypomorphic (significantly less rescue than WT mRNA but also different from MO alone). However, the negative control variant scored consistently as benign (not significantly different from WT mRNA rescue; Figure 4F). Finally, to rule out a gain-of-function hypothesis for the nonsynonymous variants and exclude an effect of WT mRNA alone on the detected phenotypes, we

confirmed that expression of WT or case-associated variant human *SIN3B* mRNA does not induce craniofacial defects or body length variations in injected larvae at 3 dpf ( $n = 36\text{--}46$  larvae/batch; repeated; Figures S4A and S4B). Together, our *in vivo* complementation data in larval zebrafish with mutation or suppression of *sin3b* reinforce the deleterious effects of *SIN3B* haploinsufficiency resulting in the clinical features noted in our human cohort.

To investigate the consequences of *SIN3B* alteration on gene regulation, we used histone H3 K27 acetylation (H3K27ac) ChIP-seq to map genome-wide enhancer and promoter states in cells derived from an individual carrying a *de novo* *SIN3B* deletion and his healthy family members (individual 1; Figure 5A). H3K27ac is a histone mark found

at active gene regulatory elements (enhancers and promoters) and is thought to be highly cell type specific.<sup>37,38</sup> This mark is therefore used to define active gene regulatory elements, and because of its robustness, this mark has been used to identify disease-specific mechanisms, especially for neurodevelopmental and degenerative disorders.<sup>39,40</sup> Here, we used the genome-wide distribution of this mark to test whether the regulatory landscape is altered in PBMCs, which would suggest that the putative repressor gene function of *SIN3B* is abrogated. Because *SIN3A* is thought to have a similar molecular function,<sup>41</sup> we also profiled an individual with a *SIN3A* deletion (individual 4 from Witteveen et al.<sup>15</sup> with a ~350 kb microdeletion) to test whether *SIN3A* and *SIN3B* gene disruption leads to similar epigenetic alterations. For comparison with healthy individuals, we also profiled PBMCs from the healthy parents of the *SIN3A* and *SIN3B* deletion-bearing individuals as well as the unaffected brother of the individual with the *SIN3A* (Figure 5A).

For each individual, we isolated PBMCs and performed two replicate H3K27ac ChIP-seq experiments. We sequenced ChIP-seq libraries and performed quality control analysis; two samples were removed because of a low fraction of reads in peaks (FrIP) or low non-redundant fraction (NRF) (see supplemental methods and Table S5). For each of the remaining samples, we called peaks by using dfilter<sup>42</sup> (average N of peaks = 23,043), merged all the peaks, and counted reads for each sample within the merged peak set. We used these peaks to calculate differential acetylation peaks between the individuals with *SIN3A* and *SIN3B* CNVs and their within-pedigree control individuals. In total, we found 500 upregulated and 32 downregulated peaks at an FDR cut-off of 5%. Principal-component analysis (PCA) of differential peaks reveals that while the healthy control individuals cluster together, the profiles from *SIN3A* and *SIN3B* CNV carriers are distinct, suggesting that their epigenomic state is altered (Figure 5B). Notably, more peaks were upregulated than downregulated, suggesting that *SIN3A* and *SIN3B* contribute to repressor function of enhancers and promoters in PBMCs (Figure 5C). To categorize the biological functions of genes with altered H3K27ac profiles, we performed Gene Ontology analysis. Among the gene regulatory elements upregulated in either mutant context, we found that various gene pathways are altered, and nucleosome assembly was the most significantly enriched (Figure 5D).

To investigate potential differences in regulatory elements influenced by either *SIN3A* or *SIN3B* independently, we analyzed differential peaks identified in each sample. These were detected when each individual was compared with his respective family members (Figure S5A), suggesting that haploinsufficiency of either *SIN3A* or *SIN3B* leads to hyperacetylation at several loci. Importantly, the epigenetic alterations observed in affected individuals with *SIN3A* and *SIN3B* CNVs were distinct in their intensity, suggesting that although they may be part of the same complex, their regulatory function appears to be non-redundant

(Figure 5E). For example, analysis of specific loci shows that some peaks are altered similarly (e.g., *TTC28* [MIM: 615098]), while other peaks are *SIN3A* or *SIN3B* specific (Figure 5F). Overall, fold changes between affected individuals and control individuals were similar for 16% of hyperacetylated peaks ( $\log_{2}FC > 1.5$ ; Figure S5B). These data are supported further by the observation that peaks significantly upregulated in the context of *SIN3A* haploinsufficiency are also significantly upregulated in the *SIN3B* mutant cells as compared with in-family controls ( $p < 0.001$ ); there was a similar observation in the reciprocal context (peaks significantly upregulated in *SIN3B* mutant cells are also significantly upregulated in *SIN3A* CNV-bearing cells [ $p < 0.001$ ]; Figure S5C). Taken together, these results suggest that, as is the case for heterozygous deletion of *SIN3A*, heterozygous *SIN3B* deletion leads to epigenetic alterations at specific loci in circulating immune cells, a cell type shown previously as a reasonable proxy for neurodevelopmental traits.<sup>43</sup> However, we are cautious in the interpretation of our data and recognize the need to analyze cells from additional *SIN3A* and *SIN3B* pedigrees, particularly those with single-gene deletions or pathogenic SNVs.

Here, we show genetic and *in vivo* modeling evidence that *de novo* *SIN3B* pathogenic variants cause a neurodevelopmental syndrome characterized by syndromic ID/DD with variable ASD, growth defects, congenital anomalies, and dysmorphic craniofacial features. Variants in epigenetic regulators, and particularly in genes modulating histone acetylation, have been associated previously with several neurodevelopmental disorders, reinforcing the importance for tightly regulated histone post-translational modification events. For example, disruptive variants in *HDAC4* (MIM: 605314) likely resulting in haploinsufficiency have been described in individuals with brachydactyly-mental retardation syndrome<sup>44,45</sup> (MIM: 600430). Additionally, *HDAC8* (MIM: 300269) loss-of-function variants cause an X-linked form of Cornelia de Lange syndrome<sup>46,47</sup> (MIM: 300882), although the likely pathogenic mechanism is impairment of cohesin subunit SMC3 deacetylation by HDAC8. These rare disorders exemplify how histone deacetylation acts as a key molecular process during human development. Moreover, although no Mendelian disorder has been associated with disrupted *HDAC7* (MIM: 606542) in humans, *Hdac7*<sup>-/-</sup> mice are embryonic lethal.<sup>48</sup> *Hdac1* and *Hdac2* disruption in mice leads to developmental defects.<sup>48</sup> Homozygous mouse *Sin3b* mutants display embryonic development defects at embryonic day (E) 13.5 with increased mortality rate and a growth retardation phenotype.<sup>49</sup>

The closely related *SIN3A* paralog (48% similarity to *SIN3B* protein sequence, CLUSTALW v.1.81, multiple sequence alignment, GenBank: NP\_056075; Figure S6), located on chromosome 15q24.2, has been associated with syndromic ID and ASD.<sup>15</sup> Clinical features of *SIN3A*-affected individuals include mild ID, recognizable facial gestalt, abnormalities in brain MRIs including ventricular dilatation, corpus callosum dysgenesis, and aberrant

cortical development. Some affected individuals were also described with ASD, seizures, microcephaly, and short stature. *In vivo* knockdown of *Sin3a* in mice impairs cortical neurogenesis, leading to a decreased number of cortical progenitors and altered cortical projections in the developing brain. Clinical features described in our *SIN3B* cohort overlap with previously described phenotypes associated with the *SIN3A*-related disorder. Our H3K27ac ChIP-seq experiments on cells from *SIN3A* and *SIN3B* CNV deletion pedigrees offer initial molecular insight to explain these similarities as well as subtle differences.

In summary, our data expand the phenotypic spectrum associated with *Sin3* complex haploinsufficiency to syndromic ID/ASD, arguing against the functional redundancy of *SIN3A* and *SIN3B*. Our findings confirm the importance of *Sin3* complex integrity for central nervous system development, anterior cartilage patterning, and growth and highlight a major role for *SIN3B* in this process.

#### Data and code availability

The NCBI reference sequence numbers for human *SIN3B* transcript and zebrafish *sin3b* transcript are GenBank NM\_015260.4 and NP\_056075.1 (hg19) and GenBank: NM\_001044945 and NP\_001038410 (GRCz10), respectively.

#### Supplemental information

Supplemental information can be found online at <https://doi.org/10.1016/j.ajhg.2021.03.017>.

#### Acknowledgments

We are grateful to individuals who participated in the study. We also thank Mr. Z. Kupchinsky and Mr. I. Pediaditakis for zebrafish husbandry; Mr. D. Morrow for assisting with reagents for *in vivo* modeling studies; and members of the Center for Human Disease Modeling for helpful discussions. This work was supported by funds from US NIH grant R01 HD096326 to N.K. and R01 MH106826 to E.E.D.

#### Declaration of interests

S.S. and K.M. are employees of GeneDx, Inc., a wholly owned subsidiary of OPKO Health, Inc. N.K. is a paid consultant for and holds significant stock of Rescindo Therapeutics, Inc. The Department of Molecular and Human Genetics at Baylor College of Medicine derives revenue from clinical genetic testing conducted at Baylor Genetics Laboratory.

Received: September 23, 2019

Accepted: March 18, 2021

Published: April 2, 2021

#### Web resources

1000 Genomes, <https://www.internationalgenome.org/>  
CHOPCHOP, <http://chopchop.cbu.uib.no/>  
ClinVar, <https://www.ncbi.nlm.nih.gov/clinvar/>

Database of Genomic Variants (DGV), <http://dgv.tcag.ca/dgv/app/home>

dbSNP, <https://www.ncbi.nlm.nih.gov/projects/SNP/>

DECIPHER, <https://decipher.sanger.ac.uk/>

ExAC browser, <http://exac.broadinstitute.org/>

Exome Variant Server, <https://evs.gs.washington.edu/EVS/>

GenBank, <https://www.ncbi.nlm.nih.gov/genbank/>

GeneMatcher, <https://genematcher.org/>

gnomAD browser, <https://gnomad.broadinstitute.org/>

OMIM, <https://omim.org/>

Primer3, <https://bioinfo.ut.ee/primer3>

SMART, <http://smart.emblheidelberg.de/smart/>

#### References

1. Izumi, K. (2016). Disorders of Transcriptional Regulation: An Emerging Category of Multiple Malformation Syndromes. *Mol. Syndromol.* 7, 262–273.
2. Tebbenkamp, A.T.N., Willsey, A.J., State, M.W., and Sestan, N. (2014). The developmental transcriptome of the human brain: implications for neurodevelopmental disorders. *Curr. Opin. Neurol.* 27, 149–156.
3. Chen, L.-F., Zhou, A.S., and West, A.E. (2017). Transcribing the connectome: roles for transcription factors and chromatin regulators in activity-dependent synapse development. *J. Neurophysiol.* 118, 755–770.
4. Larizza, L., and Finelli, P. (2019). Developmental disorders with intellectual disability driven by chromatin dysregulation: Clinical overlaps and molecular mechanisms. *Clin. Genet.* 95, 231–240.
5. Lopez-Atalaya, J.P., Valor, L.M., and Barco, A. (2014). Epigenetic factors in intellectual disability: the Rubinstein-Taybi syndrome as a paradigm of neurodevelopmental disorder with epigenetic origin. *Prog. Mol. Biol. Transl. Sci.* 128, 139–176.
6. Bjornsson, H.T. (2015). The Mendelian disorders of the epigenetic machinery. *Genome Res.* 25, 1473–1481.
7. Nan, X., Ng, H.H., Johnson, C.A., Laherty, C.D., Turner, B.M., Eisenman, R.N., and Bird, A. (1998). Transcriptional repression by the methyl-CpG-binding protein MeCP2 involves a histone deacetylase complex. *Nature* 393, 386–389.
8. Zhang, Y., Iratni, R., Erdjument-Bromage, H., Tempst, P., and Reinberg, D. (1997). Histone deacetylases and SAP18, a novel polypeptide, are components of a human Sin3 complex. *Cell* 89, 357–364.
9. Knoepfler, P.S., and Eisenman, R.N. (1999). Sin meets NuRD and other tails of repression. *Cell* 99, 447–450.
10. Grimes, J.A., Nielsen, S.J., Battaglioli, E., Miska, E.A., Speh, J.C., Berry, D.L., Atouf, F., Holdener, B.C., Mandel, G., and Kouzarides, T. (2000). The co-repressor mSin3A is a functional component of the REST-CoREST repressor complex. *J. Biol. Chem.* 275, 9461–9467.
11. Kadamb, R., Mittal, S., Bansal, N., Batra, H., and Saluja, D. (2013). Sin3: insight into its transcription regulatory functions. *Eur. J. Cell Biol.* 92, 237–246.
12. van Oevelen, C., Wang, J., Asp, P., Yan, Q., Kaelin, W.G., Jr., Kluger, Y., and Dynlacht, B.D. (2008). A role for mammalian Sin3 in permanent gene silencing. *Mol. Cell* 32, 359–370.
13. Alland, L., David, G., Shen-Li, H., Potes, J., Muhle, R., Lee, H.-C., Hou, H., Jr., Chen, K., and DePinho, R.A. (2002). Identification of mammalian Sds3 as an integral component of the

- Sin3/histone deacetylase corepressor complex. *Mol. Cell. Biol.* *22*, 2743–2750.
14. Laherty, C.D., Yang, W.M., Sun, J.M., Davie, J.R., Seto, E., and Eisenman, R.N. (1997). Histone deacetylases associated with the mSin3 corepressor mediate mad transcriptional repression. *Cell* *89*, 349–356.
  15. Witteveen, J.S., Willemsen, M.H., Dombroski, T.C.D., van Bakel, N.H.M., Nillesen, W.M., van Hulten, J.A., Jansen, E.J.R., Verkaik, D., Veenstra-Knol, H.E., van Ravenswaaij-Arts, C.M.A., et al. (2016). Haploinsufficiency of MeCP2-interacting transcriptional co-repressor SIN3A causes mild intellectual disability by affecting the development of cortical integrity. *Nat. Genet.* *48*, 877–887.
  16. Aten, E., den Hollander, N., Ruivenkamp, C., Knijnenburg, J., van Bokhoven, H., den Dunnen, J., and Breuning, M. (2009). Split hand-foot malformation, tetralogy of Fallot, mental retardation and a 1 Mb 19p deletion-evidence for further heterogeneity? *Am. J. Med. Genet. A.* *149A*, 975–981.
  17. Bens, S., Haake, A., Tönnies, H., Vater, I., Stephani, U., Holterhus, P.-M., Siebert, R., and Caliebe, A. (2011). A de novo 1.1Mb microdeletion of chromosome 19p13.11 provides indirect evidence for EPS15L1 to be a strong candidate for split hand split foot malformation. *Eur. J. Med. Genet.* *54*, e501–e504.
  18. Lek, M., Karczewski, K.J., Minikel, E.V., Samocha, K.E., Banks, E., Fennell, T., O'Donnell-Luria, A.H., Ware, J.S., Hill, A.J., Cummings, B.B., et al.; Exome Aggregation Consortium (2016). Analysis of protein-coding genetic variation in 60,706 humans. *Nature* *536*, 285–291.
  19. Gripp, K.W., Wotton, D., Edwards, M.C., Roessler, E., Ades, L., Meinecke, P., Richieri-Costa, A., Zackai, E.H., Massagué, J., Muenke, M., and Elledge, S.J. (2000). Mutations in TGIF cause holoprosencephaly and link NODAL signalling to human neural axis determination. *Nat. Genet.* *25*, 205–208.
  20. Cheong, S.-S., Hentschel, L., Davidson, A.E., Gerrelli, D., Davie, R., Rizzo, R., Pontikos, N., Plagnol, V., Moore, A.T., Sowden, J.C., et al. (2016). Mutations in CPAMD8 Cause a Unique Form of Autosomal-Recessive Anterior Segment Dysgenesis. *Am. J. Hum. Genet.* *99*, 1338–1352.
  21. Martínez, F., Caro-Llopis, A., Roselló, M., Oltra, S., Mayo, S., Monfort, S., and Orellana, C. (2017). High diagnostic yield of syndromic intellectual disability by targeted next-generation sequencing. *J. Med. Genet.* *54*, 87–92.
  22. Sobreira, N., Schiettecatte, F., Valle, D., and Hamosh, A. (2015). GeneMatcher: a matching tool for connecting investigators with an interest in the same gene. *Hum. Mutat.* *36*, 928–930.
  23. De Franco, E., Watson, R.A., Weninger, W.J., Wong, C.C., Flanagan, S.E., Caswell, R., Green, A., Tudor, C., Lelliott, C.J., Geyer, S.H., et al. (2019). A Specific CNOT1 Mutation Results in a Novel Syndrome of Pancreatic Agenesis and Holoprosencephaly through Impaired Pancreatic and Neurological Development. *Am. J. Hum. Genet.* *104*, 985–989.
  24. Kruszka, P., Berger, S.I., Weiss, K., Everson, J.L., Martinez, A.F., Hong, S., Anyane-Yeboah, K., Lipinski, R.J., and Muenke, M. (2019). A CCR4-NOT Transcription Complex, Subunit 1, CNOT1, Variant Associated with Holoprosencephaly. *Am. J. Hum. Genet.* *104*, 990–993.
  25. Vissers, L.E.L.M., Kalvakuri, S., de Boer, E., Geuer, S., Oud, M., van Outersterp, I., Kwint, M., Witmond, M., Kersten, S., Polla, D.L., et al.; DDD Study (2020). De Novo Variants in CNOT1, a Central Component of the CCR4-NOT Complex Involved in Gene Expression and RNA and Protein Stability, Cause Neurodevelopmental Delay. *Am. J. Hum. Genet.* *107*, 164–172.
  26. Moravec, C.E., Yousef, H., Kinney, B.A., Salerno-Eichenholz, R., Monestime, C.M., Martin, B.L., and Sirotkin, H.I. (2017). Zebrafish *sin3b* mutants are viable but have size, skeletal, and locomotor defects. *Dev. Dyn.* *246*, 946–955.
  27. Shaw, N.D., Brand, H., Kupchinsky, Z.A., Bengani, H., Plummer, L., Jones, T.I., Erdin, S., Williamson, K.A., Rainger, J., Stortchevoi, A., et al. (2017). SMCHD1 mutations associated with a rare muscular dystrophy can also cause isolated arhinia and Bosma arhinia microphthalmia syndrome. *Nat. Genet.* *49*, 238–248.
  28. Rooryck, C., Diaz-Font, A., Osborn, D.P.S., Chabchoub, E., Hernandez-Hernandez, V., Shamseldin, H., Kenny, J., Waters, A., Jenkins, D., Kaissi, A.A., et al. (2011). Mutations in lectin complement pathway genes COLEC11 and MASP1 cause 3MC syndrome. *Nat. Genet.* *43*, 197–203.
  29. Beunders, G., Voorhoeve, E., Golzio, C., Pardo, L.M., Rosenfeld, J.A., Talkowski, M.E., Simonic, I., Lionel, A.C., Vergult, S., Pyatt, R.E., et al. (2013). Exonic deletions in AUTS2 cause a syndromic form of intellectual disability and suggest a critical role for the C terminus. *Am. J. Hum. Genet.* *92*, 210–220.
  30. Stankiewicz, P., Khan, T.N., Szafranski, P., Slattery, L., Streff, H., Vetrini, F., Bernstein, J.A., Brown, C.W., Rosenfeld, J.A., Rednam, S., et al.; Deciphering Developmental Disorders Study (2017). Haploinsufficiency of the Chromatin Remodeler BPTF Causes Syndromic Developmental and Speech Delay, Postnatal Microcephaly, and Dysmorphic Features. *Am. J. Hum. Genet.* *101*, 503–515.
  31. Küry, S., Besnard, T., Ebstein, F., Khan, T.N., Gambin, T., Douglas, J., Bacino, C.A., Craigen, W.J., Sanders, S.J., Lehmann, A., et al. (2017). De Novo Disruption of the Proteasome Regulatory Subunit PSMD12 Causes a Syndromic Neurodevelopmental Disorder. *Am. J. Hum. Genet.* *100*, 352–363.
  32. Frosk, P., Arts, H.H., Philippe, J., Gunn, C.S., Brown, E.L., Chodirker, B., Simard, L., Majewski, J., Fahiminiya, S., Russell, C., et al.; FORGE Canada Consortium; and Canadian Rare Diseases: Models & Mechanisms Network (2017). A truncating mutation in CEP55 is the likely cause of MARCH, a novel syndrome affecting neuronal mitosis. *J. Med. Genet.* *54*, 490–501.
  33. Isrie, M., Breuss, M., Tian, G., Hansen, A.H., Cristofoli, F., Morandell, J., Kupchinsky, Z.A., Sifrim, A., Rodriguez-Rodriguez, C.M., Dapena, E.P., et al. (2015). Mutations in Either TUBB or MAPRE2 Cause Circumferential Skin Creases Kunze Type. *Am. J. Hum. Genet.* *97*, 790–800.
  34. Kague, E., Gallagher, M., Burke, S., Parsons, M., Franz-Odenaal, T., and Fisher, S. (2012). Skeletogenic fate of zebrafish cranial and trunk neural crest. *PLoS ONE* *7*, e47394.
  35. Ansar, M., Ullah, F., Paracha, S.A., Adams, D.J., Lai, A., Pais, L., Iwaszkiewicz, J., Millan, F., Sarwar, M.T., Agha, Z., et al. (2019). Bi-allelic Variants in DYNC112 Cause Syndromic Microcephaly with Intellectual Disability, Cerebral Malformations, and Dysmorphic Facial Features. *Am. J. Hum. Genet.* *104*, 1073–1087.
  36. Niederriter, A.R., Davis, E.E., Golzio, C., Oh, E.C., Tsai, I.-C., and Katsanis, N. (2013). In vivo modeling of the morbid human genome using *Danio rerio*. *J. Vis. Exp.* *78*, e50338.
  37. ENCODE Project Consortium (2012). An integrated encyclopedia of DNA elements in the human genome. *Nature* *489*, 57–74.
  38. Kundaje, A., Meuleman, W., Ernst, J., Bilenyk, M., Yen, A., Heravi-Moussavi, A., Kheradpour, P., Zhang, Z., Wang, J., Ziller,

- M.J., et al.; Roadmap Epigenomics Consortium (2015). Integrative analysis of 111 reference human epigenomes. *Nature* 518, 317–330.
39. Marzi, S.J., Leung, S.K., Ribarska, T., Hannon, E., Smith, A.R., Pishva, E., Poschmann, J., Moore, K., Troakes, C., Al-Sarraj, S., et al. (2018). A histone acetylome-wide association study of Alzheimer's disease identifies disease-associated H3K27ac differences in the entorhinal cortex. *Nat. Neurosci.* 21, 1618–1627.
  40. Sun, W., Poschmann, J., Cruz-Herrera Del Rosario, R., Parikshak, N.N., Hajan, H.S., Kumar, V., Ramasamy, R., Belgard, T.G., Elanggovan, B., Wong, C.C.Y., et al. (2016). Histone Acetylome-wide Association Study of Autism Spectrum Disorder. *Cell* 167, 1385–1397.e11.
  41. Bainor, A.J., Saini, S., Calderon, A., Casado-Polanco, R., Giner-Ramirez, B., Moncada, C., Cantor, D.J., Ernlund, A., Litovchick, L., and David, G. (2018). The HDAC-Associated Sin3B Protein Represses DREAM Complex Targets and Cooperates with APC/C to Promote Quiescence. *Cell Rep.* 25, 2797–2807.e8.
  42. Kumar, V., Muratani, M., Rayan, N.A., Kraus, P., Lufkin, T., Ng, H.H., and Prabhakar, S. (2013). Uniform, optimal signal processing of mapped deep-sequencing data. *Nat. Biotechnol.* 31, 615–622.
  43. Migliavacca, E., Golzio, C., Männik, K., Blumenthal, I., Oh, E.C., Harewood, L., Kosmicki, J.A., Loviglio, M.N., Giannuzzi, G., Hippolyte, L., et al.; 16p11.2 European Consortium (2015). A Potential Contributory Role for Ciliary Dysfunction in the 16p11.2 600 kb BP4-BP5 Pathology. *Am. J. Hum. Genet.* 96, 784–796.
  44. Villavicencio-Lorini, P., Klopocki, E., Trimborn, M., Koll, R., Mundlos, S., and Horn, D. (2013). Phenotypic variant of Brachydactyly-mental retardation syndrome in a family with an inherited interstitial 2q37.3 microdeletion including HDAC4. *Eur. J. Hum. Genet.* 21, 743–748.
  45. Wheeler, P.G., Huang, D., and Dai, Z. (2014). Haploinsufficiency of HDAC4 does not cause intellectual disability in all affected individuals. *Am. J. Med. Genet. A.* 164A, 1826–1829.
  46. Harakalova, M., van den Boogaard, M.-J., Sinke, R., van Lieshout, S., van Tuil, M.C., Duran, K., Renkens, I., Terhal, P.A., de Kovel, C., Nijman, I.J., et al. (2012). X-exome sequencing identifies a HDAC8 variant in a large pedigree with X-linked intellectual disability, truncal obesity, gynecomastia, hypogonadism and unusual face. *J. Med. Genet.* 49, 539–543.
  47. Deardorff, M.A., Bando, M., Nakato, R., Watrin, E., Itoh, T., Minamino, M., Saitoh, K., Komata, M., Katou, Y., Clark, D., et al. (2012). HDAC8 mutations in Cornelia de Lange syndrome affect the cohesin acetylation cycle. *Nature* 489, 313–317.
  48. Montgomery, R.L., Hsieh, J., Barbosa, A.C., Richardson, J.A., and Olson, E.N. (2009). Histone deacetylases 1 and 2 control the progression of neural precursors to neurons during brain development. *Proc. Natl. Acad. Sci. USA* 106, 7876–7881.
  49. David, G., Grandinetti, K.B., Finnerty, P.M., Simpson, N., Chu, G.C., and Depinho, R.A. (2008). Specific requirement of the chromatin modifier mSin3B in cell cycle exit and cellular differentiation. *Proc. Natl. Acad. Sci. USA* 105, 4168–4172.

**Supplemental information**

**Haploinsufficiency of the Sin3/HDAC corepressor  
complex member *SIN3B* causes a syndromic  
intellectual disability/autism spectrum disorder**

**Xenia Latypova, Marie Vincent, Alice Mollé, Oluwadamilare A. Adebambo, Cynthia Fourgeux, Tahir N. Khan, Alfonso Caro, Monica Rosello, Carmen Orellana, Dmitriy Niyazov, Damien Lederer, Marie Deprez, Yline Capri, Peter Kannu, Anne Claude Tabet, Jonathan Levy, Emmelien Aten, Nicolette den Hollander, Miranda Splitt, Jagdeep Walia, Ladonna L. Immken, Pawel Stankiewicz, Kirsty McWalter, Sharon Suchy, Raymond J. Louie, Shannon Bell, Roger E. Stevenson, Justine Rousseau, Catherine Willem, Christelle Retiere, Xiang-Jiao Yang, Philippe M. Campeau, Francisco Martinez, Jill A. Rosenfeld, Cédric Le Caignec, Sébastien Küry, Sandra Mercier, Kamran Moradkhani, Solène Conrad, Thomas Besnard, Benjamin Cogné, Nicholas Katsanis, Stéphane Bézieau, Jeremie Poschmann, Erica E. Davis, and Bertrand Isidor**

## SUPPLEMENTARY DATA

### Supplemental Case Reports:

**Individual 1** was 20 years old at the last clinical assessment, and he presented with autism spectrum disorder (ASD). He was born to non-consanguineous parents at 39 weeks gestational age with normal birth parameters. His development was borderline abnormal; he walked at 18 months but had no speech delay. The diagnosis of ASD with attention deficit hyperactivity disorder (ADHD) was made at the age of 18 years by a pediatric psychiatrist. Intelligence quotient (IQ) testing using the Wechsler Adult Intelligence Scale (WAIS) showed heterogeneous capacities with a global IQ of 96. He had a difficult school career but attended normal school. He has received methylphenidate treatment since the age of 9 years. He tires easily, has a general slowness and has frequent bouts of hypersomnia. His social relationships are very poor. A psychomotor evaluation at 17 years concluded global motor difficulties, dyspraxia, attention deficiency, temporospatial disorientation and relational difficulties. He also has migraines, myopia, and growth retardation (weight: 39 kg [-4SD]; height: 163 cm [-2SD]; occipital frontal circumference [OFC] 57 cm [0SD]). Dysmorphic features were also noted, including synophrys, micrognathia, small and low-set ears, and brachydactyly. Otherwise he had no epilepsy, and cerebral magnetic resonance imaging (MRI) was normal. Chromosomal microarray identified a *de novo* microdeletion of 1.02 Mb in 19p13.11 (GRCh37/hg19; chr19:16848440-17871985), encompassing 29 protein coding genes, including *SIN3B*.

**Individual 2** was last assessed clinically at 11 years of age. She was born at term after an uneventful pregnancy. Her birth weight was 2140 g (<3<sup>rd</sup> percentile), and birth length was 46 cm (<3<sup>rd</sup> percentile). She had a mild ventricular septal defect (VSD), but did not require surgery. She had recurrent bronchitis until 3 years of age. She sat alone at 1 year old, walked at 32 months old and spoke her first words at 3 years old. She had temper tantrums as a toddler, but her behavior normalized once she started speaking. Nevertheless, she was treated with low doses of methylphenidate for hyperactive behavior. She never experienced epilepsy. She had strabismus (esotropia) and amblyopia with a mild hypermetropia. Fundus examination was normal. Auditory evoked potentials, electroencephalograms (EEG) and brain MRI are normal. Her familial history was also normal. Clinical examination showed a low frontal hairline, bilateral epicanthus, thick eyebrows, synophrys, downturned corners of the mouth, bifid uvula, fifth finger clinodactyly, brachydactyly and genu recurvatum. Growth measurements were normal (weight: +1SD, height: -0.5SD, OFC: -0.5SD). At 49 months of age, her development was calculated to be equivalent to a healthy child at 24 months (Brunet

Lezine scale). Her IQ, as assessed by the Wechsler Intelligence Scale for Children (WISC) is 41. By chromosomal microarray, we detected a ~1.52 Mb *de novo* CNV deletion encompassing *SIN3B* (GRCh37/hg19; chr19:15978604-17500427).

**Individual 3** is a male last assessed at 2 years and 6 months of age. He is the third and last child of non-consanguineous healthy parents originating from Algeria. Left cleft lip and palate were discovered on a fetal ultrasound during the second trimester of pregnancy, and fetal brain MRI was unable to visualize olfactory bulbs. The family declined invasive clinical investigations. He was born at 37 weeks, with normal growth parameters (birth weight: 2850 g [22<sup>nd</sup> percentile]; birth length: 48 cm [28<sup>th</sup> percentile]; birth OFC: 32.5 cm [10<sup>th</sup> centile]). Left cleft lip/palate and olfactory bulb agenesis were confirmed at birth. Postnatal examination revealed micropenis and right iris coloboma with anterior segment dysgenesis. Echocardiography showed membranous VSD, and cerebral MRI a showed a hypoplastic corpus callosum in addition to olfactory bulb agenesis. Endocrine investigations were normal for thyroid, corticotropic and gonadotropic function. He had global developmental delay, sat at 17 months, walked at 28 months, and spoke his first words at 24 months. Postnatal microcephaly was observed with OFC at -3SD at 29 months old; weight and height were within normal average range for age. Targeted panel sequencing of genes involved in hypogonadotropic hypogonadism was negative, including analysis of the *KALI* and *CHD7* genes. Microarray revealed two *de novo* microdeletions: the first located in 19p13.11 (GRCh37/hg19; chr19:16599950-17469382) including *SIN3B* (~869 kb), and the other located in 18p11.31 (GRCh37/hg19; chr18:3192682-4854252) with a size of ~1.6 Mb.

**Individual 4** was 8 years old at her last clinical assessment. The pregnancy was uneventful and resulted in a standard delivery without neonatal complications. She was followed in genetics clinic for a spectrum of phenotypes including neurodevelopmental disorder, bifid uvula, hypotonia, strabismus, and umbilical hernia; she underwent surgery for the latter two phenotypes. Early development of motor milestones was within normal limits. She was walking by 13 months and speaking by 2 years. Learning problems were noticed in kindergarten. Neurobehavioral examination performed at the age of 8 years and 10 months described hyperactivity and impulsivity, low frustration tolerance, anxiety and poor coordination. She also displayed hypersalivation as well as difficulties with articulation and pronunciation. Particular problems were noticed for tasks that demand visual-spatial processing. These difficulties require a significant one-on-one support during training. Her brain MRI showed mild tonsillar ectopia. Microarray



testing revealed a *de novo* ~877 kb deletion at the 19p13.11 locus encompassing *SIN3B* (GRC37/hg19; chr19:16456955-17333482).

**Individual 5** was 3 years 10 months old at his last clinical examination. He is twin 2 of a dichorionic diamniotic pregnancy born after induction at 37 weeks with breech presentation. He weighed 2190 g (2-9<sup>th</sup> centile). He did not require resuscitation and was discharged on the day of delivery. He was treated for bronchiolitis at 4 weeks of age and was noted to have a heart murmur. He was diagnosed with tetralogy of Fallot, which was repaired electively at 10 months of age. Chromosomal microarray showed a *de novo* ~427 kb deletion at 19p13.11 (GRC37/hg19; chr19:16652215-17079033). His development was mildly delayed, crawling at 15 months and walking independently at 24 months. At 4 years 10 months there are no developmental concerns and he is making good progress in mainstream school. He has been discharged from Speech and Language Therapy. He has persistent drooling which is controlled by Sialanar. His twin brother had normal developmental milestones.

**Individual 6** was last assessed at 15 years of age. He was born at 35 weeks of gestation by vaginal delivery, from non-consanguineous healthy parents; he had a weight of 2400 g (50<sup>th</sup> percentile), length of 47 cm (50-75<sup>th</sup> percentile) and OFC of 33 cm (75<sup>th</sup> percentile). The parental ages at the time of his birth were 32 and 39 for the mother and father, respectively. On the paternal side of the family, there is a history of intellectual disability, autism and schizophrenia. His brother has learning disabilities and attention deficit disorder. At the time of the study, individual 6 was 10 years old with a weight of 43 kg (97<sup>th</sup> percentile), height of 145 cm (90-97<sup>th</sup> percentile) and OFC of 55.5 cm (90-97<sup>th</sup> percentile). He has mild dysmorphic facial features with a broad nasal root and a prominent forehead. The affected individual was hypotonic from the neonatal period and had motor delay, eventually achieving independent ambulation at 24 months. He has mild intellectual disability and Asperger syndrome with speech delay (speech beginning at 24 months), lack of gestures, stereotypies (flapping, swinging, hitting with objects, repeat words or sounds), gaze aversion, does not partake in group activities, lacks empathy and has restricted interests. Other neurological signs included conductive hearing loss and aggressive behavior. Brain MRI images showed defects in the corpus callosum and sub-ependymal nodular heterotopy. Targeted gene sequencing detected a *de novo* c.31delA, p.Ser11Alafs\*11 *SIN3B* variant.

**Individual 7** was adopted in infancy and no details of the pregnancy, birth, and early development are known. He was globally delayed in the preschool years and began having major motor seizures at age 3 years. He had severe speech impairment when he entered public school at age 6 years. After 4 years, he attended a multiple disability school where he remained until age 21 years. Evaluations there documented serious language impairment with echolalia and halting speech, although he could construct a full sentence. He had a shuffling gait. The IQ was 56. For the next 30 years, he lived in different community homes and at age 50 years he moved to a residential facility because of a general decline in health and the diagnosis of Parkinson disease. His seizures continued to require anticonvulsant medication. Examination at age 50 showed head circumference at the 56th centile, height below the 3rd centile and weight below the 3rd centile. He had frontal balding, large ears with attached earlobes, full and arched eyebrows and a hand tremor. Whole exome sequencing analysis identified a heterozygous single base pair deletion in *SIN3B* which was confirmed by Sanger sequencing (NM\_015260.3:c.1579del (p.Arg527Glyfs\*12)).

**Individual 8** was 3 years old at the most recent exam. He is a male of northern European descent and was referred for genetics consultation for a suspected genetic etiology of his developmental delay, short stature and neurologic problems. He was born to a 34-year-old G2P2 mother and 36-year-old father, and the mother had gestational diabetes, which was well controlled. At 35 weeks, delivery was induced due to intrauterine growth restriction (IUGR) and oligohydramnios. His birth measurements were 1673 g (1<sup>st</sup> centile) and 41.3 cm (1<sup>st</sup> centile). He spent some time in the neonatal care unit when intestinal malrotation was discovered and was subsequently repaired surgically. His development has always been globally delayed. He walked at 22 months of age and says several words. At this age he was estimated to function at the level of an ~18-month-old according to physical therapists, occupational therapists, and speech therapists. He had hypotonia, difficulty chewing, sensory problems and oral aversion. He displayed no regression or waning energy. He had normal growth parameters: Weight: 15.7 kg (76<sup>th</sup> percentile), height: 94.5 cm (40<sup>th</sup> percentile), and OFC 49 cm (40<sup>th</sup> percentile). His body mass index (BMI) was consistent with the 90<sup>th</sup> percentile. He presents with plagiocephaly, prominent coronal suture, arched and full eyebrows, and small palpebral fissures. He had no signs of ASD and showed normal social and interactive abilities. Chromosomal microarray and baseline metabolic testing yielded normal results. No brain MRI was ordered.

His mtDNA testing showed a homoplasmic variant (m.3236A>G); this change was also homoplasmic in his mother who has fatigue, irritable bowel syndrome (IBS), gastroesophageal reflux disease (GERD) and migraines but no

history of delays; and in his brother who is 4 years old and has no developmental delay for his age. Consanguinity was denied. Exome sequencing identified a rare variant in *POLG* (MIM: 174763) and a rare variant in *TWNK/C10orf2* (MIM: 606075), however, these variants were considered unlikely causes of his neurodevelopmental phenotype because they were also present in his mother and his brother. He had a *de novo* missense variant in *SIN3B* (c.249C>G; p.Ile83Met).

**Individual 9** was last examined at 5 years of age. He was born to a G3, P1 mother at 41 weeks gestation. His birth weight was 2920 g. His parents are non-consanguineous and of Jamaican background. Abnormalities were noted in his forearms since early in his life, and X-rays subsequently revealed bilateral proximal radio-ulnar synostosis. He started walking at eighteen months of age and first talked at 2 years of age. He has just completed kindergarten and appears to learn appropriately. However, he has poor eye contact and difficulties with self-regulation. He is noise sensitive and has frequent behavioral outbursts. He rarely initiates collaborative play and prefers to play by himself. He was diagnosed with ASD at severity level 1 and ADHD. He remains on no prescribed medications. On examination at age 5 years, his growth parameters are: weight: 26.9 kg, height: 120 cm and OFC: 55 cm (all >97<sup>th</sup> centile). Inspection of his facies reveals a broad forehead and high anterior hairline. He has an area of acanthosis nigricans over his back and one small hypopigmented mark. He has limited pronation and supination bilaterally. The following clinical investigations were reported as normal: SNP chromosomal array and fragile X testing, urine organic acids. Exome sequencing subsequently identified rare heterozygous variants in *CNOT1* (OMIM: 604917; NM\_016284.5: c.4661A>G, p.Ile1621Val) and *SIN3B* (c.58G>A, p.Gly20Arg). Neither variant is present in the mother, but the father is unavailable for testing. The missense variant in *CNOT1* is rare (absent from gnomAD) and has been described previously in an individual affected with sporadic amyotrophic lateral sclerosis (ALS; MIM: 105400), who also had an alternate molecular basis for the ALS.



A

*sin3b* (*Danio rerio*)ENSDARG00000062472  
Chromosome 8: 14,174,041-14,201,318  
reverse strand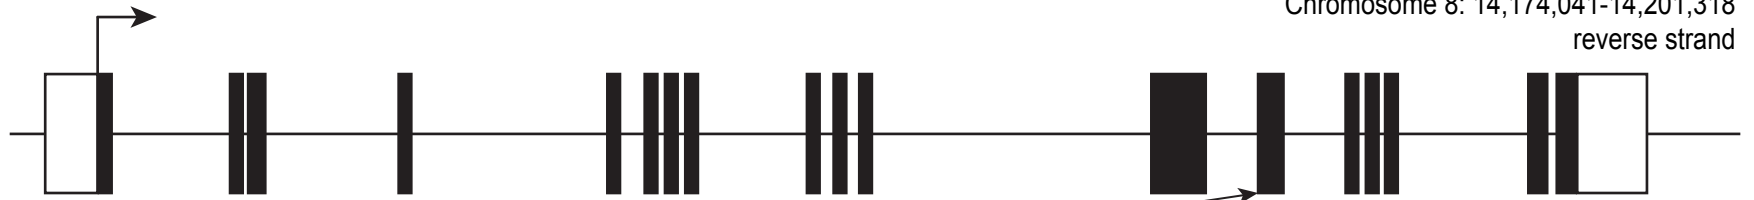

exon 13

gRNA

PAM

ACATGATCTTTAACTA**TGAGGACAAACAGATCCTGG**AGGACGCCGCTTCCCT  
 TGTACTAGAAATTGAT**ACTCCTGTTTGTCTAGGACC**TCCGTGCGGC GAAGGGA

B

UI

*sin3b* F0 mosaic CRISPR mutants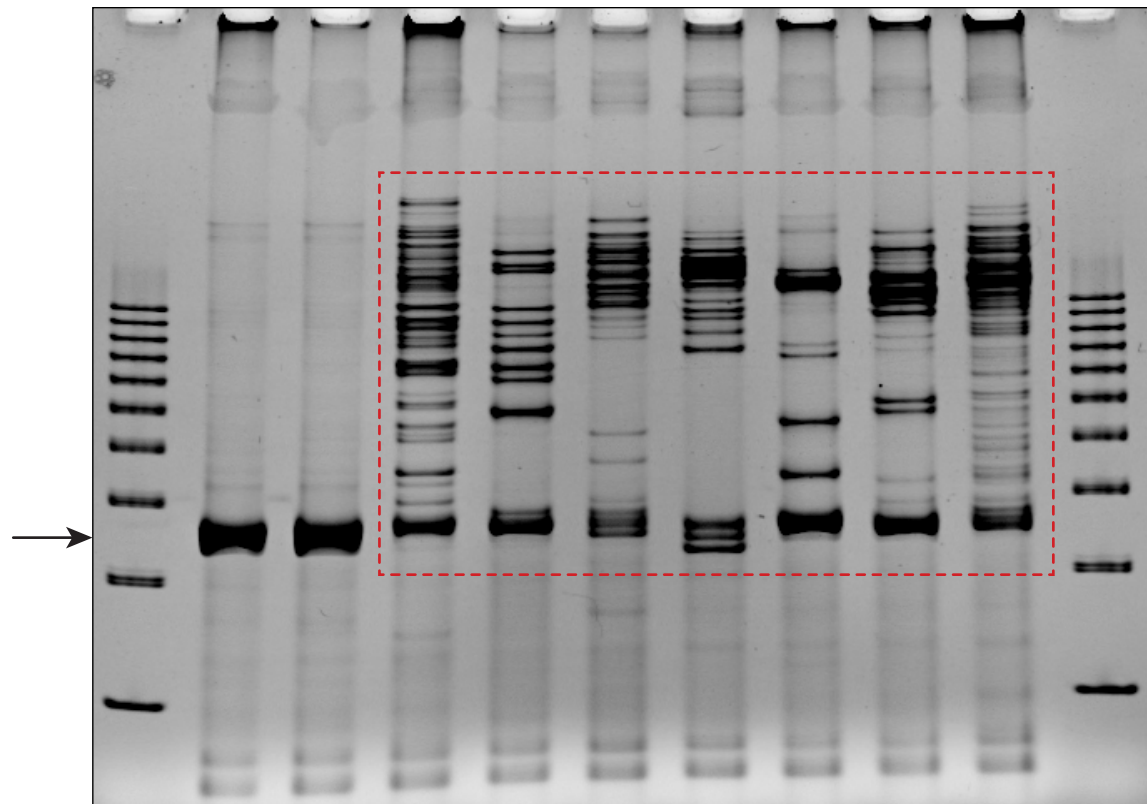

Figure S2

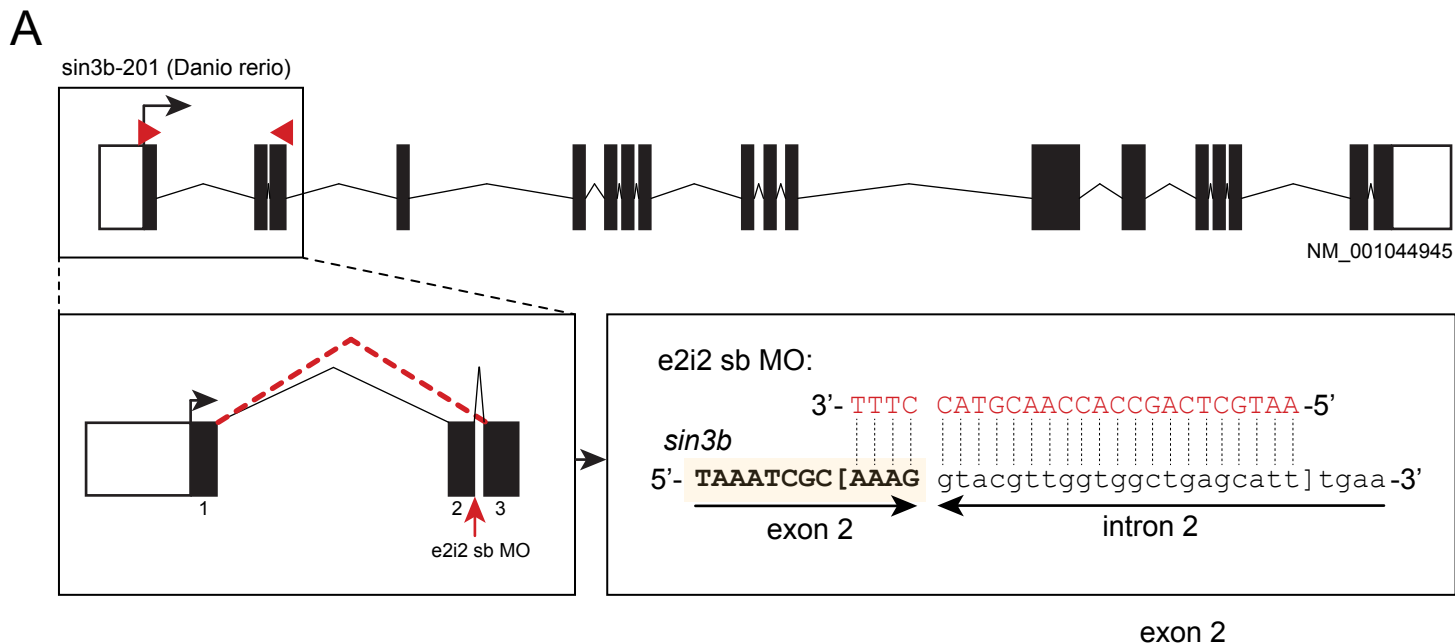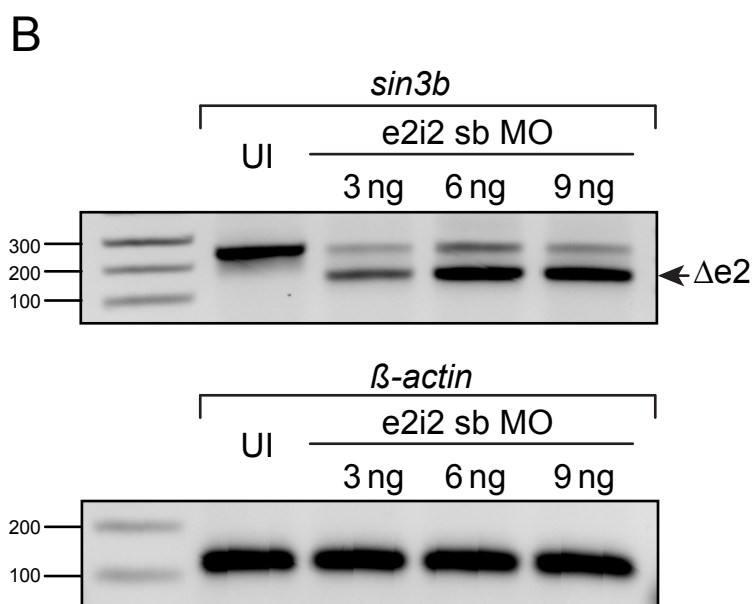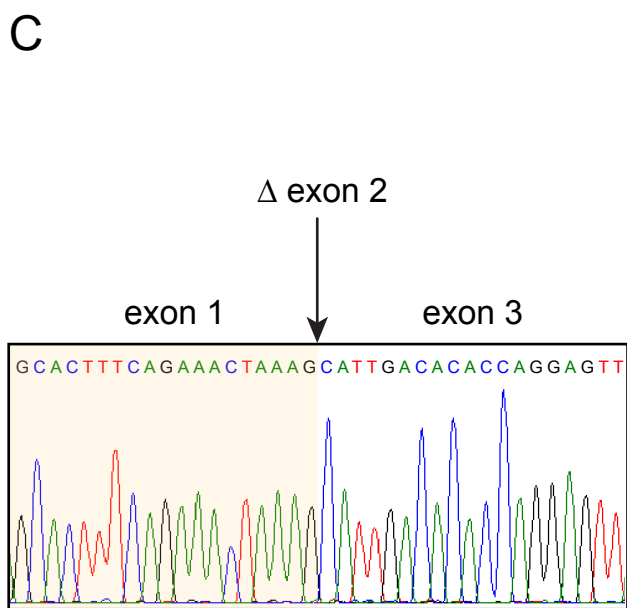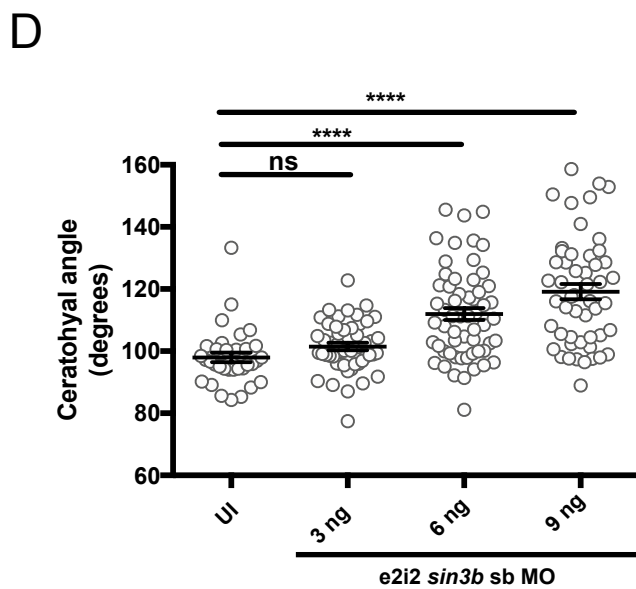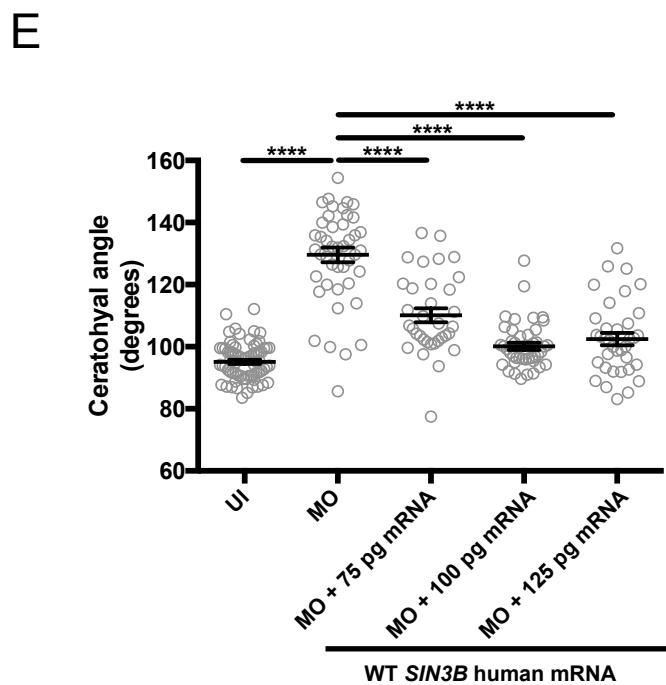

**Figure S3**

**A**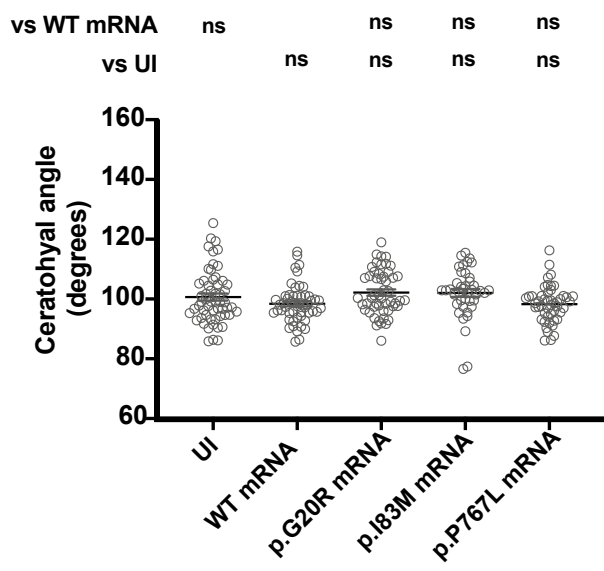**B**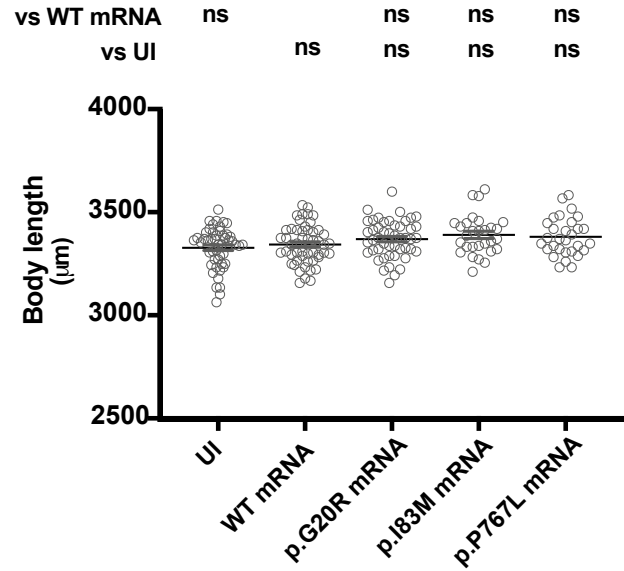**Figure S4**

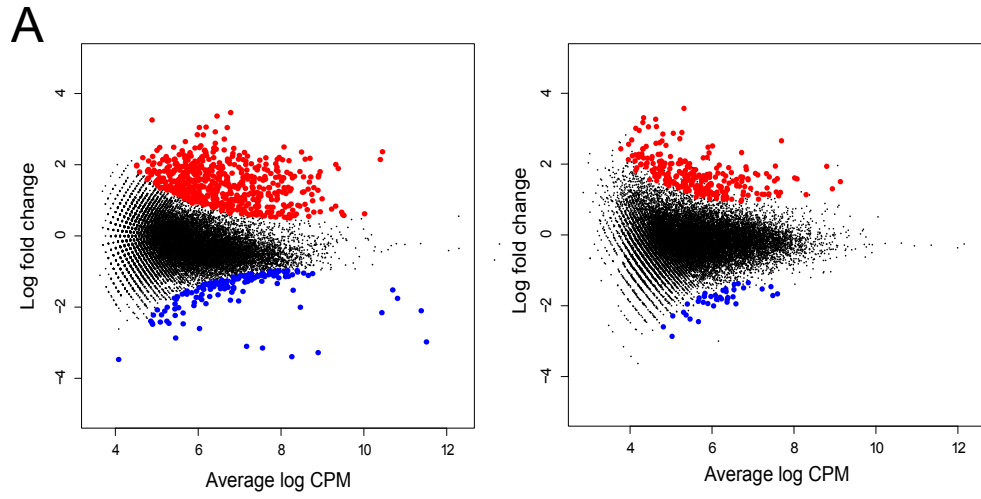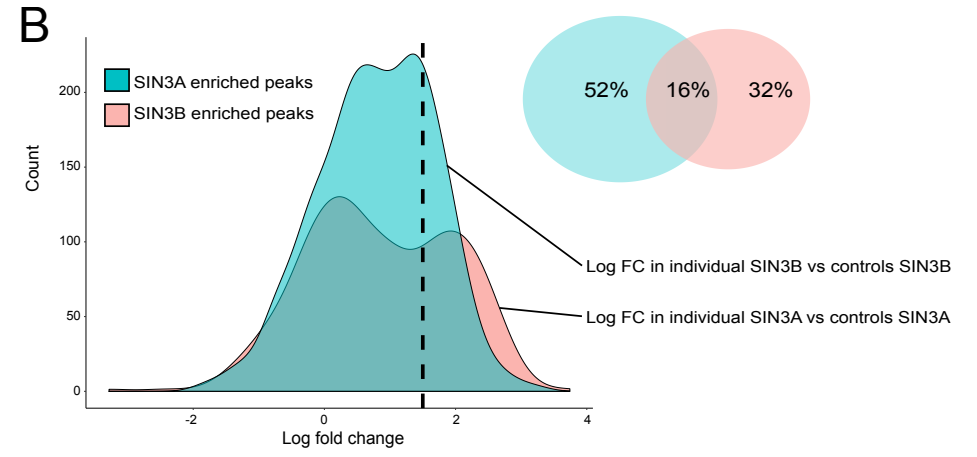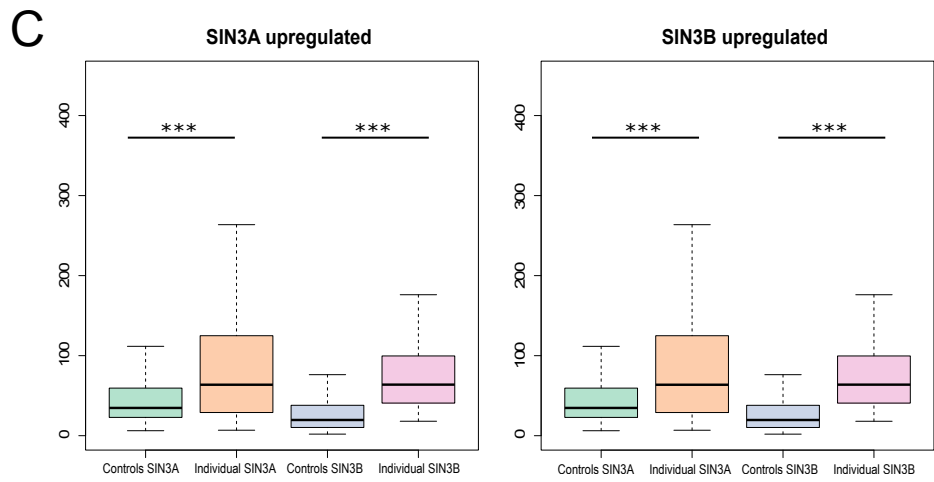

**Figure S5**



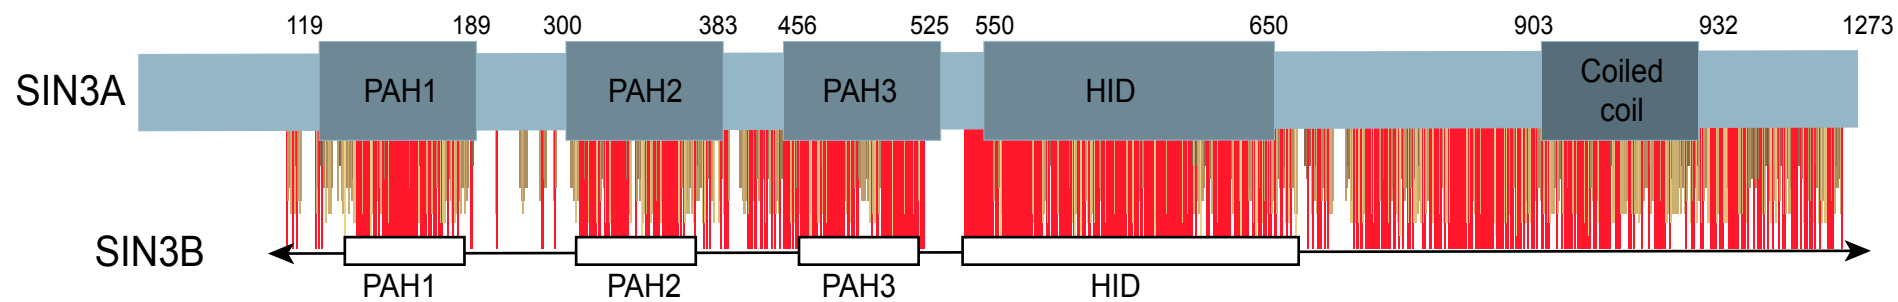

**Figure S6**

### Supplementary Figure Legends:

**Figure S1. Multiple sequence alignment of SIN3B orthologs from various eukaryotic species sorted by pairwise identity demonstrates conservation of residues affected by missense variants.** Top, schematic of human SIN3B protein (NP\_056075.1; see Figure 2A), with the location of SIN3B missense mutations indicated with vertical red arrows. Bottom, multiple sequence alignment (Clustal Omega algorithm) of 40-amino acid blocks encompassing residues Gly20, and Ile83; variants are indicated by black vertical arrows and dashed red boxes.

**Figure S2. Efficient CRISPR/Cas9 targeting of the *sin3b* genomic locus in zebrafish F0 mosaic mutants.** (A) Exon-intron structure of the zebrafish *sin3b* locus (genome assembly GRCz10; encodes GenBank ID: NP\_001038410.1, 63% identical to human *SIN3B*). Coding regions, black boxes; untranslated regions, white boxes; lines, introns. Guide (g)RNA target sites are indicated by vertical arrow on exon 13. gRNA sequence and protospacer adjacent motifs (PAM) are shown. (B) Heteroduplex analysis indicates efficient targeting of the *sin3b* locus by the gRNA. gRNA/Cas9 cocktail was injected into the cell of one-cell-stage embryos, genomic DNA was extracted at 2 days post-fertilization, PCR flanking target sites was performed. Amplicons were denatured, reannealed slowly and migrated on a polyacrylamide gel (n=2 uninjected [UI] controls and 7 F0 mutants, respectively). Heteroduplexes are indicated by red box; black arrow indicates amplification fragment at expected size for wild-type PCR product. We sequenced 24 colonies per embryo from 3 F0 mutants to confirm >90% mosaicism.

**Figure S3. Knockdown efficiency of *sin3b* morpholino antisense oligonucleotide.** (A) Exon-intron structure of the zebrafish *sin3b* locus (genome assembly GRCz10). Coding regions, black boxes; untranslated regions, white boxes; lines, introns; red arrows, primers used to assess exon 2 splicing in panel B. Below, left, a zoomed view of the targeted exon donor site shows normal and aberrant (red dashed line) splicing of exon 2. Right, base complementarity of e2i2 splice-blocking (sb) morpholino (MO) on the *sin3b* exon 2 donor splice site is indicated. Yellow box indicates exon 2. Sequence within brackets indicates targeted region. (B) e2i2 sb MO leads to exclusion of *sin3b* exon 2 ( $\Delta$ e2). Agarose gel image shows RT-PCR results obtained by primers shown in panel A (red arrows). *b-actin* was amplified to control for mRNA integrity. UI, uninjected control. (C) Chromatograms of TOPO-cloned PCR product amplifying MO-targeted region. Aberrant splicing results in exclusion of exon 2 leading to a frameshifting event and premature stop codon (p.Pro103\*). (D) *sin3b* morphants injected with increasing doses of e2i2 splice-blocking (sb) MO (from 3

to 9 ng) display a broadened CH angle at 3 days post-fertilization compared to controls. (E) Co-injection of *sin3b* e2i2 splice-blocking MO with three increasing doses of *SIN3B* WT human mRNA (from 75 to 125 pg) rescues this phenotype significantly when co-injected with 9 ng of e2i2 sb MO (n=34-72 larvae/batch, repeated). Statistical comparisons were performed with a non-parametric Kruskal-Wallis test. \*\*\*\*,  $p < 0.0001$ ; ns, not significant. Error bars represent standard error of the mean.

**Figure S4. Heterologous expression of *SIN3B* human mRNA (wild-type or variant) does not induce craniofacial defects or reduced body length in zebrafish larvae.** We injected 100 pg *in vitro* transcribed wild-type (WT) or variant *SIN3B* mRNA (NM\_015260.4) in *-1.4coll1a1:egfp* larvae and assessed ceratohyal angle or body length at 3 days post-fertilization. Variants identified in affected individuals encode p.Gly20Arg, p.Ile83Met; p.Pro767Leu is a negative control variant (rs117307745; 6 homozygotes in gnomAD) Transgenic signal was imaged live with the VAST BioImager™, and anatomical measurements were obtained using ImageJ, NIH (n=38-41 larvae/batch; See Figure 4). P-value is not significant (ns, non-parametric Kruskal-Wallis test) between mRNA-injected larvae and controls.

**Figure S5. *SIN3A* and *SIN3B* share similar acetylation profiles.** (A) MA plot showing differential acetylation peaks between the affected individual with the *de novo SIN3A* deletion and healthy members of his own family (left); and individual 1 with the *de novo SIN3B* deletion and healthy members of his own family (right). In PBMCs derived from both cases there is an overall hyperacetylation. (B) Distributions of log FC (Fold change) between affected individuals and healthy controls. For the blue curve, the peak set consists of *SIN3B* enriched peaks (log FC > 1.5) and the log FC of *SIN3A* vs his family is shown. For the pink curve, the logFC of the *SIN3B* is shown for *SIN3A* enriched peaks (log FC > 1.5). Venn diagram showing that 16% of peaks have a logFC > 1.5 in *SIN3A* individual vs his family and in *SIN3B* individual vs his family. (C) Box plots showing the peak heights in affected individuals and controls for either *SIN3A* up-regulated or *SIN3B* up-regulated peaks. y-axis, acetylation peak heights; \*\*\*,  $p < 0.001$  (Wilcoxon rank-sum test).

**Figure S6. *SIN3A* protein structure and amino acid conservation patterns with *SIN3B*.** *SIN3A* protein (UniProtKB Q96ST3) contains three N-terminal PAH domains (brown), an HDAC1 interacting domain (HID) and a central coiled-coil domain. Vertical bars below the schematic indicate conservation with *SIN3B* (UniProtKB O75182,

Multiple-sequence alignment with Clustal Omega, conservation scores obtained with Jalview program). Red bars indicate identical amino acids between SIN3A and SIN3B.

**Table S1. Exome sequencing or chromosomal microarray methodology for individuals 1-9**

| <b>Individual ID</b>                | 1                                | 2                              | 3                             | 4                             | 5                                            | 6                                   | 7                                            | 8                                            | 9                                            |
|-------------------------------------|----------------------------------|--------------------------------|-------------------------------|-------------------------------|----------------------------------------------|-------------------------------------|----------------------------------------------|----------------------------------------------|----------------------------------------------|
| <b>Contributing Research Center</b> | Nantes France                    | Gosselies Belgium              | Paris France                  | Austin/Houston USA            | Newcastle UK                                 | Valencia Spain                      | Greenwood USA                                | New Orleans USA                              | Toronto Canada                               |
| <b>Variant</b>                      | 1.02 Mb<br>(19:1684844-17871985) | 1.5Mb<br>(19:1597860-17500427) | 869 kb<br>(16599950-17469382) | 877 kb<br>(16456955-17333482) | 427 kb<br>(16652215-17079033)                | c.31_31delA<br>,<br>p.Ser11Alafs*11 | c.1579delC<br>p.Arg527Glyfs*12               | c.249C>G,<br>p.Ile83Met                      | c.58G>A<br>p.Gly20Arg                        |
| <b>WES approach</b>                 | NA                               | NA                             | NA                            | NA                            | NA                                           | Trios-Custom Panel (1256 genes)     | Next Gen - Confirmed by capillary sequencing | Next Gen - Confirmed by capillary sequencing | Next Gen - Confirmed by capillary sequencing |
| <b>Capture reagent</b>              | NA                               | NA                             | NA                            | NA                            | NA                                           | Agilent SureSelect                  | Agilent clinical research exome V2           | Agilent clinical research exome kit          | IDT xGen Exome Research Panel v1.0           |
| <b>Sequencer</b>                    | NA                               | NA                             | NA                            | NA                            | NA                                           | Illumina HiSeq 2000                 | Illumina NovaSeq                             | Illumina HiSeq 2000                          | Illumina HiSeq                               |
| <b>Microarray Platform</b>          | Agilent 60K                      | Agilent 60K                    | Agilent 60K                   | Agilent 180K (BCM V8.1)       | Whole genome 60k oligo array (ISCA version2) | NA                                  | NA                                           | NA                                           | NA                                           |

Abbreviations are as follows: ND, no data available; NA, not applicable

**Table S3: *In silico* predictions of pathogenicity for *SIN3B* missense variants**

| <b>Individual ID</b>         |             | <b>Individual 8</b>            | <b>Individual 9</b>      |
|------------------------------|-------------|--------------------------------|--------------------------|
| <b><i>SIN3B</i> variant</b>  | Nucleotide  | c.249C>G                       | c.58G>A                  |
|                              | Protein     | p.Ile83Met                     | p.Gly20Arg               |
|                              | Inheritance | <i>de novo</i>                 | ND                       |
| <b>CADD PHRED v1.4</b>       | Score       | <b>24.4</b>                    | <b>23.1</b>              |
| <b>SIFT</b>                  | Prediction  | <b>Affect protein function</b> | <b>Tolerated</b>         |
|                              | Score       | 0.00                           | 0.33                     |
|                              | Threshold   | damaging <0.05                 | damaging <0.05           |
| <b>Polyphen-2 v2.2.2r398</b> | Prediction  | <b>Probably damaging</b>       | <b>Probably damaging</b> |
|                              | Score       | 1.000                          | 0.867                    |
|                              | Threshold   | damaging >0.85                 | damaging >0.85           |
| <b>Mutation Taster</b>       | Prediction  | <b>Disease causing</b>         | <b>Disease causing</b>   |
|                              | Score       | 10                             | 125                      |
|                              | Threshold   | 0 to 215                       | 0 to 215                 |
| <b>Conservation</b>          | PhyloP      | 2.991 [flanking]               | 0.463 [flanking]         |
|                              |             | <b>1.963</b>                   | <b>2.411</b>             |
|                              |             | 0.464 [flanking]               | 2.411 [flanking]         |
|                              | phastCons   | 1 [flanking]                   | 1 [flanking]             |
|                              |             | <b>1</b>                       | <b>1</b>                 |
|                              |             | 0.998 [flanking]               | 1 [flanking]             |

Abbreviations are as follows: CADD, combined annotation dependent depletion; ND, no data available; NA, not applicable; SIFT, sorting intolerant from tolerant.

**Table S4. Primers used for *in vivo* modeling studies**

| <b>aim</b>                      | <b>name</b>              | <b>sequence</b>                        |
|---------------------------------|--------------------------|----------------------------------------|
| CRISPR_synthesis                | sin3b_G_FOR              | TAATACGACTCACTATAGTGAGGACAAACAGATCCTGG |
| CRISPR_synthesis                | sin3b_G_REV              | TTCTAGCTCTAAAAC CCAGGATCTGTTTGTCTCA    |
| CRISPR_PCR1                     | sin3b_G_PCR1_FOR         | CTAGCGCTTCTTTTTCCCTCT                  |
| CRISPR_PCR1                     | sin3b_G_PCR1_REV         | TCAGTCTCGCTAAGCTCTCCAC                 |
| morpholino_e2i2_efficiency_PCR1 | sin3b_e2i2_e3i3_PCR1-FOR | CTCACAGCAGCACTGCCAAGC                  |
| morpholino_e2i2_efficiency_PCR1 | sin3b_e2i2_e3i3_PCR1-REV | GCCTGTACTCCGTCCTGCTCC                  |

**Table S5. Quality controls performed on Chip-Seq data.** Samples with a fraction of reads in peaks (FRiP) <2% and/or non-redundancy fraction (NRF) <0.8 did not proceed for further analysis. One of the replicates from the father and one from the mother of the SIN3A family have been removed due to their poor quality (orange highlight).

| Sample     | All reads | Mapped reads | Unique reads | Peaks | FRIP | NRF |
|------------|-----------|--------------|--------------|-------|------|-----|
| Sin3A_bro1 | 5947559   | 4836777      | 5438449      | 20558 | 4.5  | 0.9 |
| Sin3A_bro2 | 5265336   | 3723635      | 4446974      | 18832 | 5.9  | 0.8 |
| Sin3A_dad1 | 10655146  | 9294979      | 10204799     | 12009 | 0.8  | 1.0 |
| Sin3A_dad2 | 5535869   | 3562419      | 4390943      | 50825 | 4.3  | 0.8 |
| Sin3A_mom1 | 6304322   | 1302353      | 1474644      | 32073 | 12.0 | 0.2 |
| Sin3A_mom2 | 7915320   | 5362653      | 6529163      | 17393 | 5.1  | 0.8 |
| Sin3A_ind1 | 12921598  | 11571635     | 12529389     | 12604 | 2.7  | 1.0 |
| Sin3A_ind2 | 10555157  | 9419854      | 10194104     | 14434 | 2.4  | 1.0 |
| Sin3b_dad1 | 4653974   | 3478512      | 3773724      | 36416 | 4.6  | 0.8 |
| Sin3b_dad2 | 4901383   | 4026913      | 4402745      | 16266 | 7.1  | 0.9 |
| Sin3b_mom1 | 7308758   | 6235833      | 6855607      | 24961 | 14.1 | 0.9 |
| Sin3b_mom2 | 5361496   | 4803034      | 5208508      | 30458 | 23.5 | 1.0 |
| Sin3b_ind1 | 5502985   | 4592394      | 5005944      | 17765 | 8.0  | 0.9 |
| Sin3b_ind2 | 5298111   | 4474531      | 4886599      | 18015 | 8.9  | 0.9 |



## **Supplementary methods:**

### **Genetic analysis**

To investigate potential tertiary structure alterations caused by nonsynonymous changes, we used template-based modeling by predicting the three-dimensional structure of SIN3B via the RaptorX online tool using SIN3B protein sequence (NP\_056075.1) as input.<sup>1</sup> We performed annotations and measurements of distances between side chains using Pymol v2.0.7, with mutagenesis and measurements wizards.

### **Zebrafish embryo husbandry**

All zebrafish work was performed in accordance with protocols approved by the Duke University Institutional Animal Care and Use Committee. Zebrafish adults (*Danio rerio*, wild-type strain ZDR, Aquatica BioTech) were maintained under continuous water flow and automatic control of a 14h/10h light/dark cycle, at 28°C. Zebrafish embryos were obtained by natural matings and reared at 28°C in a media composed of 0.3 g/L NaCl, 75 mg/L CaSO<sub>4</sub>, 37.5 mg/L NaHCO<sub>3</sub>, and 0.003% methylene blue. Phenotyping was performed at 3 days post fertilization (dpf) with the investigator blinded to experimental conditions.

### ***sin3b* CRISPR/Cas9 genome editing**

We designed a guide (g) RNA targeting *sin3b* (GRCz10: ENSDARG00000062472), using CHOPCHOP v2.<sup>2,3</sup> gRNA was transcribed *in vitro* with the GeneArt precision gRNA synthesis kit (primer sequences available in Table S5; Thermo Fisher). We targeted the *sin3b* locus by microinjection into the cell of 1-cell stage embryos with 1 nl of cocktail containing 100 pg gRNA and 200 pg Cas9. Individual embryos (n=8) were collected at 1 dpf for DNA extraction to assess targeting efficiency. We PCR-amplified the gRNA target with primers located in flanking regions (Table S5), denatured the resulting product, and reannealed it slowly to form heteroduplexes (95°C for 5 min, ramped down to 85°C at -1°C/s and then to 25°C at -0.1°C/s). We performed polyacrylamide gel electrophoresis (PAGE) on a 20% precast 1 mm gel (Thermo Fisher) to visualize heteroduplexes as an indication of insertions and/or deletion events.<sup>4</sup> To estimate mosaicism of F0 mutants, PCR products were cloned into a TOPO-TA vector (Thermo Fisher) and individual colonies (n=24) were Sanger sequenced (n=3 larvae/gRNA).

### **Transient *sin3b* suppression and heterologous expression experiments**

With support from GeneTools, we designed a splice blocking (sb) morpholino (MO) targeting the splice donor site of exon 2 (e2i2; 5'- AATGCTCAGCCACCAACGTACCTTT-3') of *sin3b* (GeneTools, LLC; Figure S4), and injected 1 nl of MO into the yolk of zebrafish embryos at one-to-four cell stage. At one dpf, we harvested uninjected control and MO-injected larvae in Trizol (Thermo Fisher), extracted total RNA by isopropanol-mediated precipitation, and conducted first-strand cDNA synthesis with the QuantiTect Reverse Transcription kit (Qiagen). The targeted region of *sin3b* was PCR-amplified using primers complementary to flanking exons (Table S4), and amplicons were migrated by electrophoresis on a 1 % agarose gel; bands were extracted, gel purified using QIAquick gel extraction kit (Qiagen) and resulting clones were Sanger sequenced. The optimal MO dose for *in vivo* complementation experiments was determined by injection of three concentrations of MO (3, 6, 9 ng of e2i2). Gateway-compatible *SIN3B* (NM\_015260.4) open reading frame (ORF) clone was provided by Genecopoeia and we transferred this ORF to a pCS2+ vector by LR clonase II-mediated recombination (Thermo Fisher) and validated sequences by Sanger sequencing. We introduced point mutations encoding variants identified in affected individuals (p.Gly20Arg, p.Ile83Met) or a negative control variant (p.Pro767Leu; rs117307745; 6 homozygotes in gnomAD, accessed June 2019) using site-directed mutagenesis as described.<sup>5</sup> Linearized pCS2+ vectors containing WT or mutant ORFs were transcribed *in vitro* with the mMessage mMachine SP6 Transcription kit (Ambion).

### **Live imaging of zebrafish larvae**

We performed a morphometric assessment of the zebrafish larval craniofacial structures and body length at 3 dpf using the Vertebrate Automated Screening Technology (VAST BioImager™, Union Biometrica). Live larvae were anesthetized with tricaine and loaded in a microcapillary for automated imaging using default parameters as described.<sup>6-8</sup> Ceratohyal angle and body length were measured on ventral fluorescent and lateral bright field images, respectively, with ImageJ (NIH). Statistical analyses were performed using an unpaired bilateral Student's t-test (GraphPad Prism software).

### **Acetylated tubulin immunostaining**

We performed standard whole-mount immunostaining on 3 dpf zebrafish larvae. Animals were anesthetized with tricaine, and fixed in Dent's solution. Primary detection was carried out with anti- $\alpha$ -acetylated tubulin antibody (T7451, mouse Sigma-Aldrich, 1:1000 dilution) and secondary detection was facilitated with Alexa Fluor 594 goat

anti-mouse IgG (ThermoFisher, 1:500 dilution). Dorsal images of fluorescent signal were acquired with an AZ100 microscope (Nikon) equipped with a Nikon digital sight black and white camera and NIS Elements software (Nikon). Commissural neurons were quantified by counting the number of axon tracts that cross the dorsal midline between the optic tecta as described.<sup>9</sup>

### **PBMC isolation and freezing**

Peripheral blood mononuclear cells (PBMCs) from affected individuals and their family members were isolated by Ficoll gradient on EDTA-anticoagulated blood. Briefly, 5 mL of blood was diluted 1:2 in PBS. 5 mL of lymphocytes separation medium (Eurobio, catalog number CMSMSL0101) was added in another tube. The diluted blood was carefully added to the hand-leaned tube containing Ficoll to avoid mixing with Ficoll solution. Centrifugation was performed at 2000 rpm for 20 min at room temperature with medium acceleration and no brake. PBMCs were found at the white ring formed between the red cells at the bottom and the plasma at the top of the tube. PBMCs were collected and washed in 50 mL of PBS centrifuged at 1500 rpm for 10 min at 4°C. PBMCs were then resuspended in 5 mL PBS. After counting, PBMCs were distributed by 2M cells per 250 µL in a solution containing 10% dimethyl sulfoxide (DMSO) and 20% fetal bovine serum (FBS) in PBS. Samples were stored at -80°C until use. In this experiment, 2M cells in replicate samples per condition were used.

### **Chromatin Immunoprecipitation (ChIP)- sequencing (seq) Experiments**

We resuspended 2M PBMCs in 40 µL PBS. Cells were lysed for 20 min at 4°C in 40 µL 2X Lysis buffer (100 mM Tris-HCl pH 8, 300 mM NaCl, 2% Triton X-100, 0.2% sodium deoxycholate, 10mM CaCl<sub>2</sub>) with protease inhibitor cocktail (catalog number P2714, Sigma Aldrich) and 5 mM sodium butyrate. Chromatin was fragmented with 300 units of Micrococcal nuclease (MNase; M0247S, New England Biolabs) per well for 10 minutes at 37°C. MNase digestion was stopped with 80 µL Lysis Dilution buffer (50 mM Tris-HCl pH 8, 150 mM NaCl, 1% Triton X-100, 50 mM EGTA, 1 mM EDTA, 0.1% sodium deoxycholate). After full speed centrifugation, supernatants were collected and filled up to 400 µl. 2.5% of each sample were pooled and kept as input. 2 µg of anti-H3K27ac (catalog number 39133, Active Motif) was added to each sample and rotated at 15 rpm at 4°C overnight. 25 µL G-protein dynabeads (Life Sciences) were added in each sample and submitted to rotation for 4 hours at 4°C. Beads were then washed twice with 200 µL of each of the following buffers (ice-cold): Wash buffer 1 (50 mM KOH HEPES pH 7.5, 150 mM NaCl,

2mM EDTA, 1% Triton X-100, 0.1% sodium deoxycholate, 0.1% SDS), Wash buffer 2 (50 mM KOH HEPES pH 7.5, 300 mM NaCl, 2 mM EDTA, 1% Triton X-100, 0.1% sodium deoxycholate, 0.1% SDS), Wash buffer 3 (10 mM Tris-HCl pH 8, 250 mM LiCl, 1 mM EDTA, 0.5% NP40, 0.5% sodium deoxycholate). Final wash was performed in 200µL TE buffer (10 mM Tris-HCl pH 8, 1 mM EDTA). ChIP beads were eluted in 50 µL of ChIP elution buffer (50mM Tris-HCl pH7.5, 10mM EDTA, 1% SDS) with several cycles of 5 min incubation at 63°C / vortex for a total of 30 minutes prior to bead removal. ChIP and input samples were then digested with 250 µG/mL proteinase K (catalog number GEXPRK006R; Eurobio) in 50 µL TE buffer for 1 hour at 63°C. Samples were then filled up to 400 µL with TE buffer. DNA ChIP were then isolated by phenol chloroform isoamyllic acid (PCIAA) method and purified DNA was resuspended in 42 µL elution buffer (EB, 10mM Tris-HCl buffer pH8). Libraries were then prepared as described.<sup>10,11</sup> Libraries were verified by Bioanalyzer (Caliper) for peaks sizes. Equimolar pools were performed prior QC and sequencing. NGS on Illumina high throughput NextSeq 500 (75 bp single-end) was performed.

### **ChIP-seq analysis**

Single-end reads were mapped to the GRCh37 genome by the BWA algorithm<sup>12</sup> and duplicate reads (read-pairs mapping to the same genomic location) were collapsed. Reads mapping to non-canonical and mitochondrial chromosomes were also removed. For each sample, ChIP-seq peaks were detected using DFilter<sup>13</sup> at a P-value threshold of  $1 \times 10^{-6}$ , and peaks were selected only if they are present in both duplicates. Poor quality samples (Fraction of reads in peaks [FRiP] < 2% and/or non-redundancy fraction [NRF] < 0.8) were discarded.<sup>13</sup> A set of consensus peaks was then obtained by combining all the samples, thus obtaining a read count on these peaks using Bedtools.<sup>14</sup> To perform Differential Peak Calling, differentially acetylated (DA) peaks were determined using edgeR<sup>15, 16</sup> after a counts per million (cpm) normalization. For this analysis, only the peaks with at least 2 cpm in 8 of the 12 samples were retained and the DA peaks were defined with a Benjamini-Hochberg Q-value  $\leq 5\%$ . For data representation (PCA plot and heatmap) peaks were rlog transformed [Deseq2]. For boxplots, statistical analyses between affected individual and control acetylation rate either in the SIN3A up-regulated or SIN3B up-regulated set of peaks were performed on rlog normalized data with a Wilcoxon rank-sum test.

To determine gene ontology enrichment in up-regulated peaks, we used the GREAT tool by associating genomic regions with genes in a basal plus extension way according to GREAT parameters.<sup>17</sup> Test regions, corresponding to the set of up-regulated peaks between the SIN3A individual + SIN3B individual vs controls, were compared to a

background set of peaks consisting of consensus peaks on which the differential analysis was performed. A minimum of 5 affected genes and a threshold of statistical significance of  $FDR < 0.05$  were used, all non-redundant ontologies were selected.

## Supplemental references

1. Källberg, M. *et al.* Template-based protein structure modeling using the RaptorX web server. *Nat. Protoc.* **7**, 1511–1522 (2012).
2. Montague, T. G., Cruz, J. M., Gagnon, J. A., Church, G. M. & Valen, E. CHOPCHOP: a CRISPR/Cas9 and TALEN web tool for genome editing. *Nucleic Acids Res.* **42**, W401–407 (2014).
3. Labun, K., Montague, T. G., Gagnon, J. A., Thyme, S. B. & Valen, E. CHOPCHOP v2: a web tool for the next generation of CRISPR genome engineering. *Nucleic Acids Res.* **44**, W272–276 (2016).
4. Zhu, X. *et al.* An efficient genotyping method for genome-modified animals and human cells generated with CRISPR/Cas9 system. *Sci. Rep.* **4**, 6420 (2014).
5. Niederriter, A. R. *et al.* In vivo modeling of the morbid human genome using Danio rerio. *J. Vis. Exp. JoVE* e50338 (2013). doi:10.3791/50338
6. Frosk, P. *et al.* A truncating mutation in CEP55 is the likely cause of MARCH, a novel syndrome affecting neuronal mitosis. *J. Med. Genet.* **54**, 490–501 (2017).
7. Isrie, M. *et al.* Mutations in Either TUBB or MAPRE2 Cause Circumferential Skin Creases Kunze Type. *Am. J. Hum. Genet.* **97**, 790–800 (2015).
8. Shaw, N. D. *et al.* SMCHD1 mutations associated with a rare muscular dystrophy can also cause isolated arhinia and Bosma arhinia microphthalmia syndrome. *Nat. Genet.* **49**, 238–248 (2017).
9. Ansar, M. *et al.* Bi-allelic Variants in DYNC112 Cause Syndromic Microcephaly with Intellectual Disability, Cerebral Malformations, and Dysmorphic Facial Features. *Am. J. Hum. Genet.* **104**, 1073–1087 (2019).
10. Sun, W. *et al.* Histone Acetylome-wide Association Study of Autism Spectrum Disorder. *Cell* **167**, 1385–1397.e11 (2016).
11. Quail, M. A. *et al.* A large genome center’s improvements to the Illumina sequencing system. *Nat. Methods* **5**, 1005–1010 (2008).
12. Li, H. & Durbin, R. Fast and accurate long-read alignment with Burrows-Wheeler transform. *Bioinforma. Oxf. Engl.* **26**, 589–595 (2010).
13. Kumar, V. *et al.* Uniform, optimal signal processing of mapped deep-sequencing data. *Nat. Biotechnol.* **31**, 615–622 (2013).
14. Quinlan, A. R. & Hall, I. M. BEDTools: a flexible suite of utilities for comparing genomic features. *Bioinforma. Oxf. Engl.* **26**, 841–842 (2010).
15. McCarthy, D. J., Chen, Y. & Smyth, G. K. Differential expression analysis of multifactor RNA-Seq experiments with respect to biological variation. *Nucleic Acids Res.* **40**, 4288–4297 (2012).
16. Robinson, M. D., McCarthy, D. J. & Smyth, G. K. edgeR: a Bioconductor package for differential expression analysis of digital gene expression data. *Bioinforma. Oxf. Engl.* **26**, 139–140 (2010).
17. McLean, C. Y. *et al.* GREAT improves functional interpretation of *cis*-regulatory regions. *Nat. Biotechnol.* **28**, 495–501 (2010).
